# Supplementary material
Source: Royal Society of Chemistry journal article supplement (doi:10.1039/d6cc01343k)
Supplement: d6cc01343k2.pdf [file d6cc01343k2.pdf]

*Supporting Information For:*

**A Dual-Metal Strategy for N-Heterocycle Coordination  
Using Nickel and Aluminum**

Gabriel J. Jobin and Marcus W. Drover\*

\*E-mail: marcus.drover@uwo.ca

Department of Chemistry, Western University, 1151 Richmond Street,  
London, ON, N8K 3G6, Canada

|                                    |            |
|------------------------------------|------------|
| <b>1. Experimental Section</b>     | <b>S2</b>  |
| <b>2. Preparation of Compounds</b> | <b>S3</b>  |
| <b>3. Spectroscopic Data</b>       | <b>S8</b>  |
| <b>4. Mass Spectrometry</b>        | <b>S34</b> |
| <b>5. Computational Details</b>    | <b>S35</b> |
| <b>6. References</b>               | <b>S36</b> |

## **1. Experimental Section:**

**General Considerations.** All experiments were carried out employing standard Schlenk techniques under an atmosphere of dry nitrogen employing degassed, dried solvents. Nonhalogenated solvents were tested with a standard purple solution of sodium benzophenone ketyl in tetrahydrofuran to confirm effective moisture removal. Fluorobenzene and  $\text{CDCl}_3$  were dried over molecular sieves and degassed by three freeze-pump-thaw cycles. All other reagents were purchased from commercial vendors and used without further purification unless otherwise stated. Compound **2** was prepared as previously reported.<sup>1</sup>

**Physical methods.**  $^1\text{H}$  NMR spectra are reported in parts per million (ppm) and are referenced to residual solvent e.g.,  $^1\text{H}(\text{C}_6\text{D}_6)$ :  $\delta = 7.16$ ;  $^{13}\text{C}(\text{C}_6\text{D}_6)$ :  $\delta = 128.06$ ; coupling constants are reported in Hz.  $^{13}\text{C}$ ,  $^{11}\text{B}$ ,  $^{19}\text{F}$ , and  $^{31}\text{P}$  NMR spectra were performed as proton-decoupled experiments (unless explicitly stated otherwise) and are reported in ppm.

## 2. Preparation of Compounds:

**tri-*tert*-butyl-benzyl-2-dipentafluorophenylaluminumyl-diphosphinoethane,  $t\text{Bu}_2\text{PCH}_2\text{CH}_2\text{P}^t\text{Bu}(\text{Bz})\text{-}o\text{-Al}(\text{C}_6\text{F}_5)_2$**  (3,

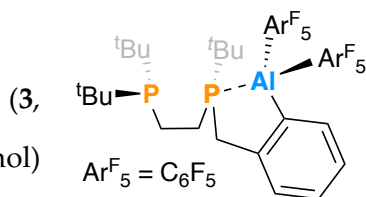

$\text{C}_{33}\text{H}_{37}\text{AlF}_{10}\text{P}_2$ ,  $M_w = 712$  g/mol). In a glovebox, **2** (32 mg, 0.074 mmol)

was weighed into a 20 mL scintillation vial equipped with a stir bar

and dissolved in approximately 2 mL of pentane. A solution of *n*-BuLi (30  $\mu\text{L}$ , 0.074 mmol) was added dropwise, and the reaction mixture was stirred for 30 min. During this time, the solution

changed color from colorless to yellow. The solvent was removed *in-vacuo*, and the residue was dissolved in 1 mL of toluene. This solution was then added to a vial containing  $\text{AlCl}(\text{C}_6\text{F}_5)_2$  (29

mg, 0.074 mmol) and stirred vigorously for 1 min. Upon addition of  $\text{AlCl}(\text{C}_6\text{F}_5)_2$ , the clear yellow solution turned cloudy white. The mixture was concentrated to dryness and washed with pentane

(3  $\times$  2 mL). Filtration afforded **3** as a clear, colorless oil (43 mg, 81%).

**$^1\text{H}$  NMR (400 MHz,  $\text{C}_6\text{D}_6$ , 298 K):**  $\delta_{\text{H}} = 8.26$  (t,  $J_{\text{H,H}} = 4.07$ , 1H; CH *o*-Al), 7.21 (m, 1H; Aryl CH), 7.20 (m, 1H; Aryl CH), 7.03 (dd,  $J_{\text{H,H}} = 4.89$  Hz,  $J_{\text{H,H}} = 3.89$  Hz, 1H; Aryl CH), 3.21 (dd,  $J_{\text{H,P}} = 4.75$  Hz,  $J_{\text{H,H}} = 16.4$  Hz, 1H; PCH<sub>2</sub> (Bz)), 2.63 (dd,  $J_{\text{H,P}} = 4.75$  Hz,  $J_{\text{H,H}} = 16.4$  Hz, 1H; PCH<sub>2</sub> (Bz)), 2.11 (m, 2H; PCH<sub>2</sub>CH<sub>2</sub>P), 1.84 (m, 2H; PCH<sub>2</sub>CH<sub>2</sub>P), 0.74 (d,  $J_{\text{H,P}} = 10.9$  Hz, 18H; P(*t*Bu)<sub>2</sub>), 0.70 (d,  $J_{\text{H,P}} = 14.6$  Hz, 9H; P(*t*Bu)(Bz)).

**$^{31}\text{P}\{^1\text{H}\}$  NMR (243 MHz,  $\text{C}_6\text{D}_6$ , 298 K):**  $\delta_{\text{P}} = 37.4$  (d,  $J_{\text{P,P}} = 39.3$  Hz; P(*t*Bu)<sub>2</sub>), 1.13 (br. d,  $J_{\text{P,P}} = 39.3$  Hz; P-Al).

**$^{19}\text{F}\{^1\text{H}\}$  NMR (376 MHz,  $\text{C}_6\text{D}_6$ , 298 K):**  $\delta_{\text{F}} = -119.2$  (m, 2F; *o*-C<sub>6</sub>F<sub>5</sub>), -119.6 (m, 2F; *o*-C<sub>6</sub>F<sub>5</sub>), -152.0 (t,  $J_{\text{F,F}} = 19.3$  Hz, 1F; *p*-C<sub>6</sub>F<sub>5</sub>), -152.98 (t,  $J_{\text{F,F}} = 19.9$  Hz, 1F; *p*-C<sub>6</sub>F<sub>5</sub>), -160.4 (m, 2F; *m*-C<sub>6</sub>F<sub>5</sub>), -161 (m, 2F; *m*-C<sub>6</sub>F<sub>5</sub>).

**$^{13}\text{C}\{^1\text{H}\}$  NMR (151 MHz,  $\text{C}_6\text{D}_6$ , 298 K):**  $\delta_{\text{C}} = 151.1\text{-}149.0$  (br.; C<sub>6</sub>F<sub>5</sub>), 144.4 (d,  $J_{\text{C,P}} = 2.60$  Hz, Bz *ipso*-Aryl C), 138.2 (br.; C<sub>6</sub>F<sub>5</sub>), 138.0 (m; Aryl CH *o*-Al), 136.5 (br.; C<sub>6</sub>F<sub>5</sub>), 129.5 (d,  $J_{\text{C,P}} = 1.2$  Hz; Aryl CH), 128.0 (Aryl CH, buried), 127.0 (d,  $J_{\text{C,P}} = 3.3$  Hz; Aryl CH), 31.5 (dd,  $J_{\text{C,P}} = 26.1, 21.3$  Hz, P(*t*Bu)<sub>2</sub> C-

(CH<sub>3</sub>), 30.4 (d,  $J_{C,P}$  = 24.0 Hz; Bz CH<sub>2</sub>), 29.3 (dd,  $J_{C,P}$  = 9.20 Hz, 4.70 Hz, P(<sup>t</sup>Bu)(Bz) C-(CH<sub>3</sub>)), 29.2 (d,  $J_{P,C}$  = 13.7 Hz; P(<sup>t</sup>Bu)<sub>2</sub>-CH<sub>3</sub>), 28.9 (d,  $J_{P,C}$  = 13.8 Hz; P(<sup>t</sup>Bu)<sub>2</sub>-CH<sub>3</sub>), 26.3 (d,  $J_{P,C}$  = 3.43 Hz; P(<sup>t</sup>Bu)(Bz)-CH<sub>3</sub>), 22.6 (m; PCH<sub>2</sub>CH<sub>2</sub>P).

**HR-APCI-MS:** C<sub>33</sub>H<sub>38</sub>AlF<sub>10</sub>P<sub>2</sub> ([M+H]<sup>+</sup>) (713.210, calculated); (713.211, observed) & C<sub>33</sub>H<sub>38</sub>AlOF<sub>10</sub>P<sub>2</sub> ([M+O+H]<sup>+</sup>) (729.205, calculated); (729.205, observed).

**tri-tert-butyl-benzyl-2-dipentafluorophenylaluminumyl-**

**diphosphinoethane, <sup>t</sup>Bu<sub>2</sub>PCH<sub>2</sub>CH<sub>2</sub>P<sup>t</sup>Bu(Bz)-o-Al(C<sub>6</sub>F<sub>5</sub>)<sub>2</sub>-pyridine (3-pyr;**

C<sub>38</sub>H<sub>42</sub>AlF<sub>10</sub>NP<sub>2</sub>, M<sub>w</sub> = 791 g/mol). In a glovebox, **3** (23 mg, 0.032 mmol) was weighed into a 20 mL scintillation vial equipped with a stir bar and dissolved in approximately 0.5 mL C<sub>6</sub>D<sub>6</sub>. Pyridine (3.6 μL, 0.045 mmol) was added *via*

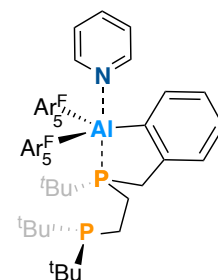

microsyringe, and the reaction mixture was stirred for 10 min. Transfer a NMR tube and analysis by <sup>31</sup>P NMR spectroscopy, showed formation of **3-pyr** in >99% conversion (80% purity, 7% (<sup>t</sup>Bu)<sub>2</sub>PCH<sub>2</sub>CH<sub>2</sub>P(<sup>t</sup>Bu)(Bz), 13% dimer carried through from synthesis of **3**). This compound was not isolated and used immediately as it was found to undergo Al-C hydrolysis upon standing.

**<sup>1</sup>H NMR (400 MHz, C<sub>6</sub>D<sub>6</sub>, 298 K, selected signals):** δ<sub>H</sub> = 7.64 (d,  $J_{H,H}$  = 7.16 Hz, 1H; Aryl-CH *o*-Al), 7.23 (t,  $J_{H,H}$  = 7.18 Hz, 1H; Bz Aryl-CH), 7.15 (d,  $J_{H,H}$  = 7.79 Hz, 1H; Bz Aryl-CH) 7.10 (t,  $J_{H,H}$  = 7.31 Hz, 1H; Aryl-CH), 3.48 (d,  $J_{H,H}$  = 15.4 Hz, 1H; Bz CH<sub>2</sub>), 2.90 (dd,  $J_{P,H}$  = 7.97 Hz,  $J_{H,H}$  = 15.4 Hz, 1H; Bz CH<sub>2</sub>), 1.74 (m, 4H; PCH<sub>2</sub>CH<sub>2</sub>P), 0.88 (d,  $J_{P,H}$  = 10.8 Hz, 9H; P(<sup>t</sup>Bu)<sub>2</sub>), 0.87 (d,  $J_{P,H}$  = 10.8 Hz, 9H; P(<sup>t</sup>Bu)<sub>2</sub>), 0.74 (d,  $J_{P,H}$  = 12.1 Hz, 9H; P(<sup>t</sup>Bu)(Bz)).

**<sup>31</sup>P{<sup>1</sup>H} NMR (243 MHz, C<sub>6</sub>D<sub>6</sub>, 298 K):** δ<sub>P</sub> = 37.3 (d,  $J_{P,P}$  = 31.1 Hz; P(<sup>t</sup>Bu)<sub>2</sub>), -1.10 (br. m, P(<sup>t</sup>Bu)(Bz)).

**<sup>19</sup>F NMR (376 MHz, C<sub>6</sub>D<sub>6</sub>, 298 K):** δ<sub>F</sub> = -118.7 (br. m, 2F, *o*-C<sub>6</sub>F<sub>5</sub>), -119.7 (m, 2F, *o*-C<sub>6</sub>F<sub>5</sub>), -154.0 (br. m, 2F, *p*-C<sub>6</sub>F<sub>5</sub>), -161.0 (br. m, 2F, *m*-C<sub>6</sub>F<sub>5</sub>), -161.3 (br. m, 2F, *o*-C<sub>6</sub>F<sub>5</sub>).

**nickel tri-tert-butyl-benzyl-2-dipentafluorophenylaluminumyl-diphosphinoethane- $\eta^2$ -C,C-pyridine,**

**$\text{Ni}(\text{}^t\text{Bu}_2\text{PCH}_2\text{CH}_2\text{P}(\text{}^t\text{Bu})(\text{Bz})\text{-}o\text{-Al}(\text{C}_6\text{F}_5)_2\text{-pyr}$  (**4-pyr**;  $\text{C}_{38}\text{H}_{42}\text{AlF}_{10}\text{NNiP}_2$ ,  $M_w = 850$  g/mol). In a glovebox, **3-pyr** (27 mg, 0.032 mmol) was dissolved in approximately 0.5 mL of  $\text{C}_6\text{D}_6$ .  $[\text{Ni}(\text{COD})_2]$  (8 mg, 0.029 mmol) was then added to this and stirred until**

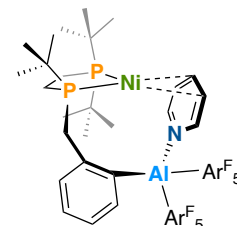

complete dissolution was observed. After 30 min of stirring, the solution changed from clear yellow to dark orange, with full conversion confirmed by  $^{31}\text{P}$  NMR spectroscopy. The solvent was removed *in vacuo*, and the residue was washed with pentane ( $3 \times 3$  mL); removal of solvent *in vacuo* afforded **4-pyr** as an orange powder (12 mg, 44%).

$^1\text{H}$  NMR (400 MHz,  $\text{C}_6\text{D}_6$ , 298 K):  $\delta_{\text{H}} = 8.43$  (br. s, 1H; CH *o*-N), 7.38 (d,  $J_{\text{H,H}} = 6.34$  Hz, 1H; Aryl CH *o*-Al), 7.11 (m, 2H; Bz CH, overlapping signals), 6.85 (d,  $J_{\text{H,H}} = 7.75$  Hz, 1H; Bz CH *m*-Al), 6.40 (m, 1H; pyr CH), 5.26 (t,  $J_{\text{H,H}} = 6.24$  Hz, 1H; pyr CH), 4.21 (br. s, 1H; pyr Ni-CH), 3.71 (br. s, 1H; pyr Ni-CH), 3.55 (d,  $J_{\text{H,H}} = 13.4$  Hz, 1H; Bz CH<sub>2</sub>), 3.23 (t,  $J_{\text{H,H}} = 13.4$  Hz,  $J_{\text{H,P}} = 14.5$  Hz, 1H; Bz CH<sub>2</sub>), 1.70 (m, 2H; ( $^t\text{Bu}$ )(Bz)PCH<sub>2</sub>CH<sub>2</sub>P( $^t\text{Bu}$ )<sub>2</sub>), 1.26 (m, 2H; ( $^t\text{Bu}$ )(Bz)PCH<sub>2</sub>CH<sub>2</sub>P( $^t\text{Bu}$ )<sub>2</sub>, buried), 0.71 (d,  $J_{\text{H,P}} = 12.3$  Hz, 9H; P( $^t\text{Bu}$ )<sub>2</sub>), 0.58 (d,  $J_{\text{H,P}} = 12.4$  Hz, 9H; P( $^t\text{Bu}$ )(Bz)), 0.57 (d,  $J_{\text{H,P}} = 12.8$  Hz, 9H; P( $^t\text{Bu}$ )<sub>2</sub>).

$^{31}\text{P}\{^1\text{H}\}$  NMR (243 MHz,  $\text{C}_6\text{D}_6$ , 298 K):  $\delta_{\text{P}} = 79.7$  (d,  $J_{\text{P,P}} = 58.5$  Hz; P( $^t\text{Bu}$ )<sub>2</sub>), 56.7 (d,  $J_{\text{P,P}} = 58.5$  Hz; P( $^t\text{Bu}$ )(Bz)).

$^{19}\text{F}\{^1\text{H}\}$  NMR (376 MHz,  $\text{C}_6\text{D}_6$ , 298 K):  $\delta_{\text{F}} = -119.5$  (m, 2F; *o*-C<sub>6</sub>F<sub>5</sub>), -120.0 (m, 2F; *o*-C<sub>6</sub>F<sub>5</sub>), -153.9 (t,  $J_{\text{F,F}} = 20.1$  Hz, 1F; *p*-C<sub>6</sub>F<sub>5</sub>), -154.5 (t,  $J_{\text{F,F}} = 19.2$  Hz, 1F; *p*-C<sub>6</sub>F<sub>5</sub>), -161.2 (m, 2F; *m*-C<sub>6</sub>F<sub>5</sub>), -161.6 (m, 2F; *m*-C<sub>6</sub>F<sub>5</sub>).

$^{13}\text{C}\{^1\text{H}\}$  NMR (151 MHz,  $\text{C}_6\text{D}_6$ , 298 K):  $\delta_{\text{C}} = 151.2$  (br. m; C<sub>6</sub>F<sub>5</sub>), 149.7 (br. m; C<sub>6</sub>F<sub>5</sub>), 142.9 (br. s; Bz *ipso*-Aryl C), 139.2 (s; Aryl CH *o*-Al), 138.5 (br. s; pyr CH), 138.1 (br. m; C<sub>6</sub>F<sub>5</sub>), 136.4 (br. m; C<sub>6</sub>F<sub>5</sub>), 129.1 (d,  $J_{\text{C,P}} = 3.80$  Hz; Bz Aryl-CH), 128.8 (d,  $J_{\text{C,P}} = 1.7$  Hz, pyr CH), 127.6 (s; Bz Aryl-CH, buried), 125.4, (d,  $J_{\text{C,P}} = 2.65$  Hz; Bz Aryl-CH), 114.3 (s; pyr CH), 62.7 (br. m; Ni-CH), 51.1 (br. m; Ni-CH), 35.4 (dd,  $J_{\text{C,P}} = 5.28, 4.17$  Hz; P( $^t\text{Bu}$ )<sub>2</sub> C-(CH<sub>3</sub>)<sub>3</sub>), 34.3 (m; Bz CH<sub>2</sub>), 31.6 (dd,  $J_{\text{C,P}} = 7.22, 4.06$  Hz;

P(<sup>t</sup>Bu)(Bz) C-(CH<sub>3</sub>)<sub>3</sub>, 30.2 (d,  $J_{P,C}$  = 6.02 Hz; P(<sup>t</sup>Bu)<sub>2</sub> CH<sub>3</sub>), 28.8 (d,  $J_{C,P}$  = 4.92 Hz; P(<sup>t</sup>Bu)<sub>2</sub> CH<sub>3</sub>), 27.3 (d,  $J_{P,C}$  = 5.33 Hz; P(<sup>t</sup>Bu)<sub>2</sub> CH<sub>3</sub>), 22.3 (m; PCH<sub>2</sub>PCH<sub>2</sub>P), 22.2 (m; PCH<sub>2</sub>CH<sub>2</sub>P).

**HR-LIFDI-MS:** C<sub>38</sub>H<sub>42</sub>AlF<sub>10</sub>NNiP<sub>2</sub> ([M]<sup>+</sup>) (849.180, calculated); (849.179, observed).

**nickel tri-tert-butyl-benzyl-2-dipentafluorophenylaluminumyl-diphosphinoethane-η<sup>2</sup>-C,C-quinoline, Ni(<sup>t</sup>Bu)<sub>2</sub>PCH<sub>2</sub>CH<sub>2</sub>P(<sup>t</sup>Bu)(Bz)-o-**

**Al(C<sub>6</sub>F<sub>5</sub>)<sub>2</sub>-quin (5-quin; C<sub>42</sub>H<sub>44</sub>AlF<sub>10</sub>NP<sub>2</sub>, M<sub>w</sub> = 900.43 g/mol).** In a glovebox, **3** and quinoline were combined to putatively give **3-quin** (27 mg, 0.032 mmol) in approximately 0.5 mL of C<sub>6</sub>D<sub>6</sub>. [Ni(COD)<sub>2</sub>] (8 mg, 0.029 mmol) was then

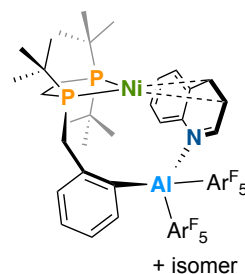

added to this and stirred until complete dissolution was observed. After 30 minutes of stirring, the solution changed from a clear yellow to a dark red solution, with full conversion by <sup>31</sup>P NMR. Solvent was then removed *in-vacuo*, followed by repeated washing with pentane (3 x 3 mL). The compound was then dried to give **5-quin** as an orange powder as a mixture of primarily two isomers in a 1:0.35 ratio (14 mg, 54%).

**<sup>1</sup>H NMR (400 MHz, C<sub>6</sub>D<sub>6</sub>, 298 K, major isomer):** δ<sub>H</sub> = 8.80 (m, 1H; Quin CH *o*-N), 8.06 (d,  $J_{H,H}$  = 7.00 Hz, 1H; Aryl CH *o*-Al), 7.54 (d,  $J_{H,H}$  = 8.13 Hz, 1H; Quin-C<sub>6</sub>H<sub>4</sub> CH), 7.13 (t,  $J_{H,H}$  = 7.13 Hz, 1H; Bz Ar-CH), 7.08 (t,  $J_{H,H}$  = 7.45 Hz, 1H; Bz Ar-CH), 6.83 (d,  $J_{H,H}$  = 7.60 Hz, 1H; Bz Ar-CH), 6.81 (m, 1H; Quin-C<sub>6</sub>H<sub>4</sub> CH), 6.78 (d,  $J_{H,H}$  = 7.56 Hz, 1H; Quin C<sub>6</sub>H<sub>4</sub> CH), 6.67 (t,  $J_{H,H}$  = 7.46 Hz, 1H; Quin C<sub>6</sub>H<sub>4</sub> CH), 4.73 (br. s, 1H; Quin Ni-CH), 3.89 (d,  $J_{H,H}$  = 13.6 Hz, 1H; Bz CH<sub>2</sub>), 3.86 (br. s, 1H; Quin Ni-CH), 3.25 (t, 1H,  $J_{H,H}$  = 13.6 Hz,  $J_{H,P}$  = 14.9 Hz; Bz CH<sub>2</sub>), 1.66 (m, 4H; PCH<sub>2</sub>CH<sub>2</sub>P), 0.73 (d,  $J_{P,H}$  = 12.4 Hz, 9H; P(<sup>t</sup>Bu)<sub>2</sub>), 0.54 (d,  $J_{P,H}$  = 12.6 Hz, 9H; P(<sup>t</sup>Bu)(Bz)), 0.15 (d,  $J_{P,H}$  = 13.3 Hz, 9H; P(<sup>t</sup>Bu)<sub>2</sub>).

**<sup>1</sup>H NMR (400 MHz, C<sub>6</sub>D<sub>6</sub>, 298 K, selected signals for minor isomer):** δ<sub>H</sub> = 8.86 (m, 1H; Quin CH *o*-N), 7.28 (d,  $J_{H,H}$  = 13.0 Hz, 1H; Quin CH), 7.12 (m, 1H; Quin CH, buried), 6.81 (m, 1H; Quin CH, buried), 6.64 (t,  $J_{H,H}$  = 7.49 Hz, 1H; Quin CH), 4.90 (br. s, 1H; Quin Ni-CH), 3.92 (br. s, 1H; Quin Ni-CH, buried).

**$^{31}\text{P}\{^1\text{H}\}$  NMR (243 MHz,  $\text{C}_6\text{D}_6$ , 298 K, major isomer):**  $\delta_{\text{P}} = 78.0$  (d,  $J_{\text{P,P}} = 44.0$  Hz;  $\text{P}(\text{tBu})_2$ ),  $55.0$  (d,  $J_{\text{P,P}} = 44.0$  Hz;  $\text{P}(\text{tBu})(\text{Bz})$ ).

**$^{31}\text{P}\{^1\text{H}\}$  NMR (243 MHz,  $\text{C}_6\text{D}_6$ , 298 K, minor isomer):**  $\delta_{\text{P}} = 86.3$  (d,  $J_{\text{P,P}} = 44.0$  Hz;  $\text{P}(\text{tBu})_2$ ),  $60.9$  (d,  $J_{\text{P,P}} = 39.0$  Hz;  $\text{P}(\text{tBu})(\text{Bz})$ ).

**$^{19}\text{F}\{^1\text{H}\}$  NMR (376 MHz,  $\text{C}_6\text{D}_6$ , 298 K, major isomer):**  $\delta_{\text{F}} = -119.1$  (m, 2F, *o*- $\text{C}_6\text{F}_5$ ),  $-119.5$  (m, 2F, *o*- $\text{C}_6\text{F}_5$ ),  $-154.2$  (t,  $J_{\text{F,F}} = 19.5$  Hz, 1F; *p*- $\text{C}_6\text{F}_5$ ),  $-154.6$  (t,  $J_{\text{F,F}} = 20.0$  Hz, 1F; *p*- $\text{C}_6\text{F}_5$ ),  $-161.4$  (m, 2F, *m*- $\text{C}_6\text{F}_5$ ),  $-161.7$  (m, 2F, *m*- $\text{C}_6\text{F}_5$ ).

**$^{19}\text{F}\{^1\text{H}\}$  NMR (376 MHz,  $\text{C}_6\text{D}_6$ , 298 K, minor isomer):**  $\delta_{\text{F}} = -117.1$  (m, 2F, *o*- $\text{C}_6\text{F}_5$ ),  $-119.5$  (m, 2F, *o*- $\text{C}_6\text{F}_5$ , buried),  $-154.9$  (t,  $J_{\text{F,F}} = 20.1$  Hz, 1F; *p*- $\text{C}_6\text{F}_5$ ),  $-155.7$  (t,  $J_{\text{F,F}} = 19.5$  Hz, 1F; *p*- $\text{C}_6\text{F}_5$ ),  $-162.8$  (m, 2F, *m*- $\text{C}_6\text{F}_5$ ),  $-163.3$  (m, 2F, *m*- $\text{C}_6\text{F}_5$ ).

**$^{13}\text{C}\{^1\text{H}\}$  NMR (151 MHz,  $\text{C}_6\text{D}_6$ , 298 K, major isomer only):**  $\delta_{\text{C}} = 151.3$  (br. m;  $\text{C}_6\text{F}_5$ ),  $149.7$  (br. m;  $\text{C}_6\text{F}_5$ ),  $142.3$  (br. s; Bz *ipso*-Aryl C),  $139.7$  (s; Aryl-CH *o*-Al),  $138.3$  (br. m;  $\text{C}_6\text{F}_5$ ),  $136.4$  (br. m;  $\text{C}_6\text{F}_5$ ),  $130.3$  (s; Quin CH *o*-N),  $129.3$  (s; Bz Ar-CH),  $127.6$  (d,  $J_{\text{C,P}} = 11.6$  Hz; Bz Aryl-CH),  $126.4$  (s; Quin  $\text{C}_6\text{H}_4$  CH),  $125.7$  (s; Quin  $\text{C}_6\text{H}_4$  CH),  $125.3$  (br. s; Bz Aryl-CH),  $124.3$  (s; Quin  $\text{C}_6\text{H}_4$  CH),  $120.1$  (s; Quin- $\text{C}_6\text{H}_4$  CH),  $64.2$  (m; Quin Ni-CH),  $54.1$  (d,  $J_{\text{C,P}} = 23.4$  Hz; Quin Ni-CH),  $35.5$  (t,  $J_{\text{C,P}} = 10.3$  Hz; Bz  $\text{CH}_2$ ),  $34.3$  (dd,  $J_{\text{C,P}} = 7.35, 2.24$  Hz;  $\text{P}(\text{tBu})_2$  C-( $\text{CH}_3$ )<sub>3</sub>),  $32.2$  (dd,  $J_{\text{C,P}} = 8.03, 4.01$  Hz;  $\text{P}(\text{tBu})(\text{Bz})$  C-( $\text{CH}_3$ )<sub>3</sub>),  $29.8$  (d,  $J_{\text{C,P}} = 5.16$  Hz;  $\text{P}(\text{tBu})_2$   $\text{CH}_3$ ),  $28.4$  (d,  $J_{\text{C,P}} = 4.95$  Hz;  $\text{P}(\text{tBu})_2$   $\text{CH}_3$ ),  $27.1$  (d,  $J_{\text{C,P}} = 4.92$  Hz;  $\text{P}(\text{tBu})(\text{Bz})$   $\text{CH}_3$ ),  $22.5$  (br. m.;  $\text{PCH}_2\text{CH}_2\text{P}$ ).

**HR-LIFDI-MS:**  $\text{C}_{42}\text{H}_{44}\text{AlF}_{10}\text{NNiP}_2$  ( $[\text{M}]^+$ ) (899.195, calculated); (899.195, observed).

### 3. Spectroscopic Data:

Figure S1.  $2^1$ ,  $^1\text{H}$  NMR,  $\text{C}_6\text{D}_6$ , 400 MHz, 298 K.

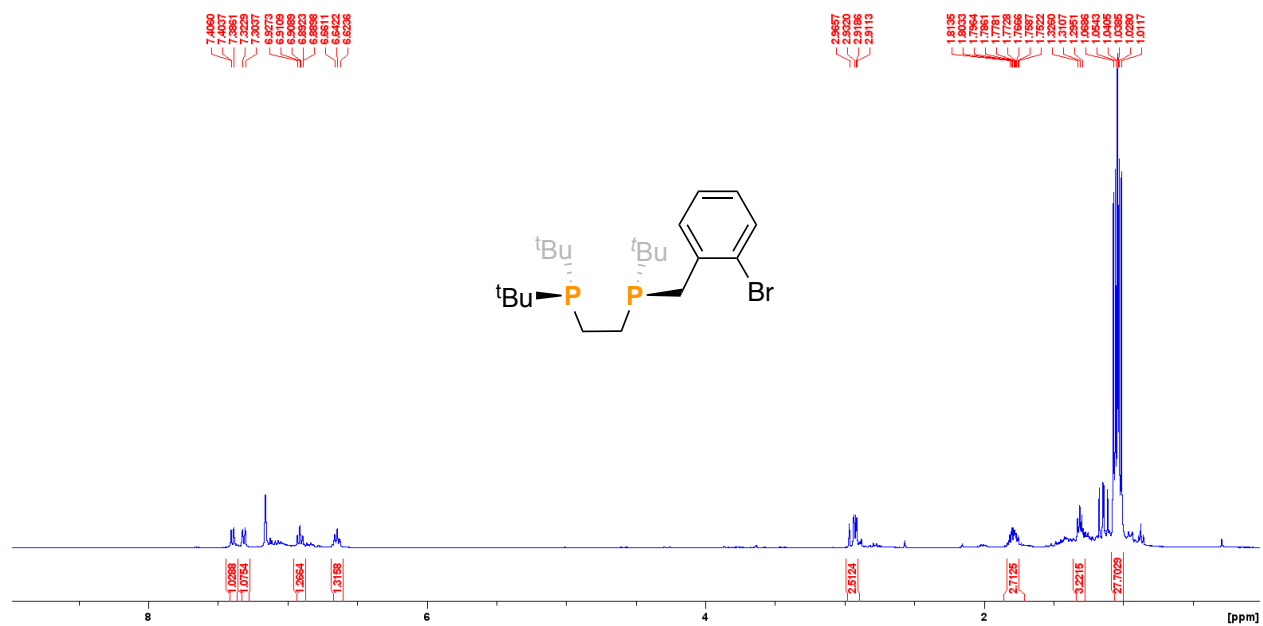

Figure S2.  $2^1$ ,  $^{31}\text{P}\{^1\text{H}\}$  NMR,  $\text{C}_6\text{D}_6$ , 162 MHz, 298 K.

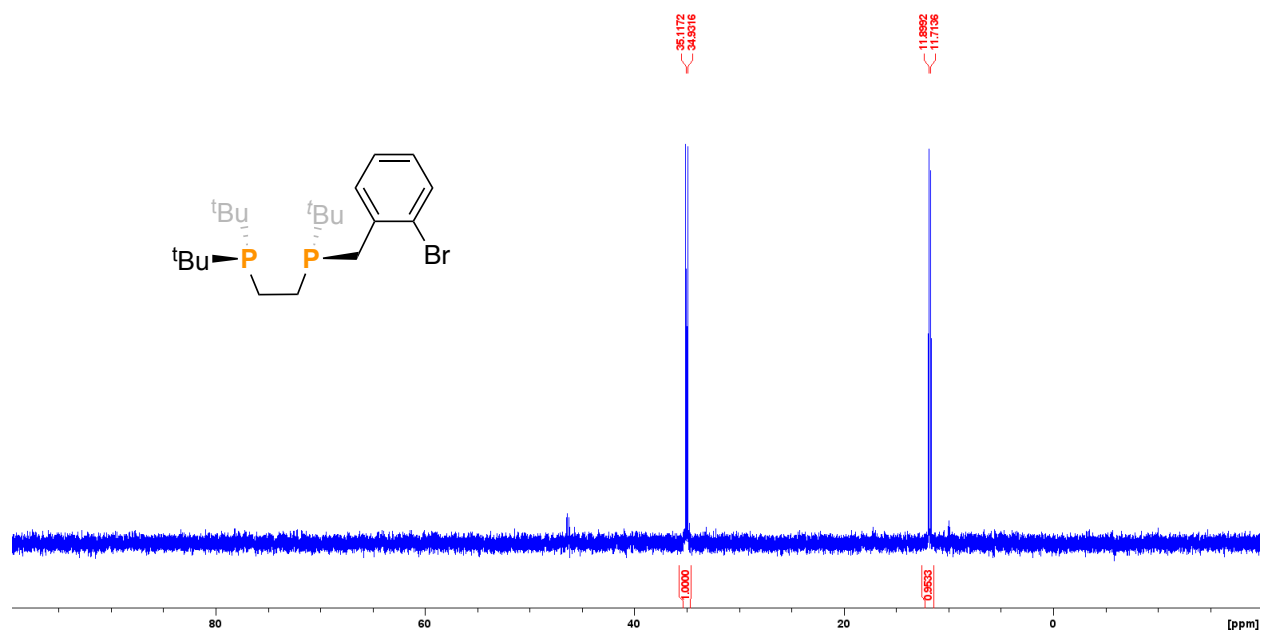

**Figure S3. 3,**  $^1\text{H}$  NMR,  $\text{C}_6\text{D}_6$ , 400 MHz, 298 K. \* =  $\text{P}(\text{tBu})$  peaks arising from minor phosphine impurities

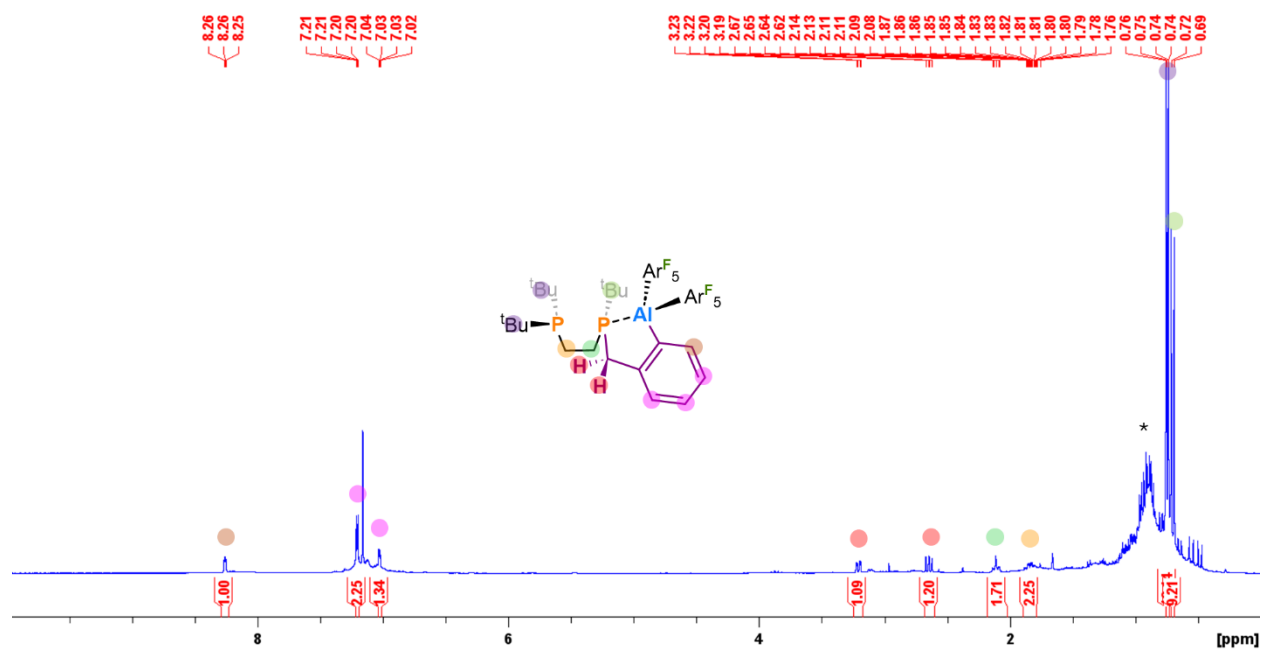

**Figure S4. 3,**  $^1\text{H}$  and  $^1\text{H}\{^{31}\text{P}\}$  NMR (expansion),  $\text{C}_6\text{D}_6$ , 400 MHz, 298 K.

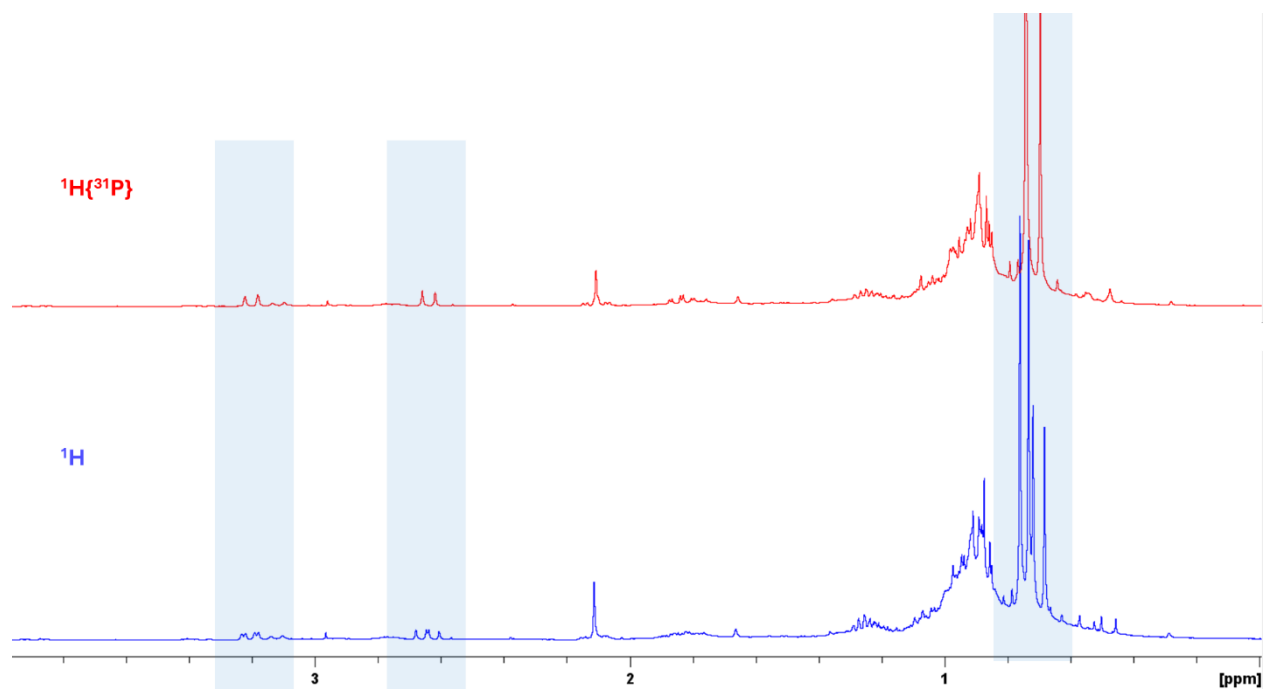

Figure S5. 3,  $^1\text{H}$ - $^1\text{H}$  COSY NMR,  $\text{C}_6\text{D}_6$ , 600 MHz, 298 K.

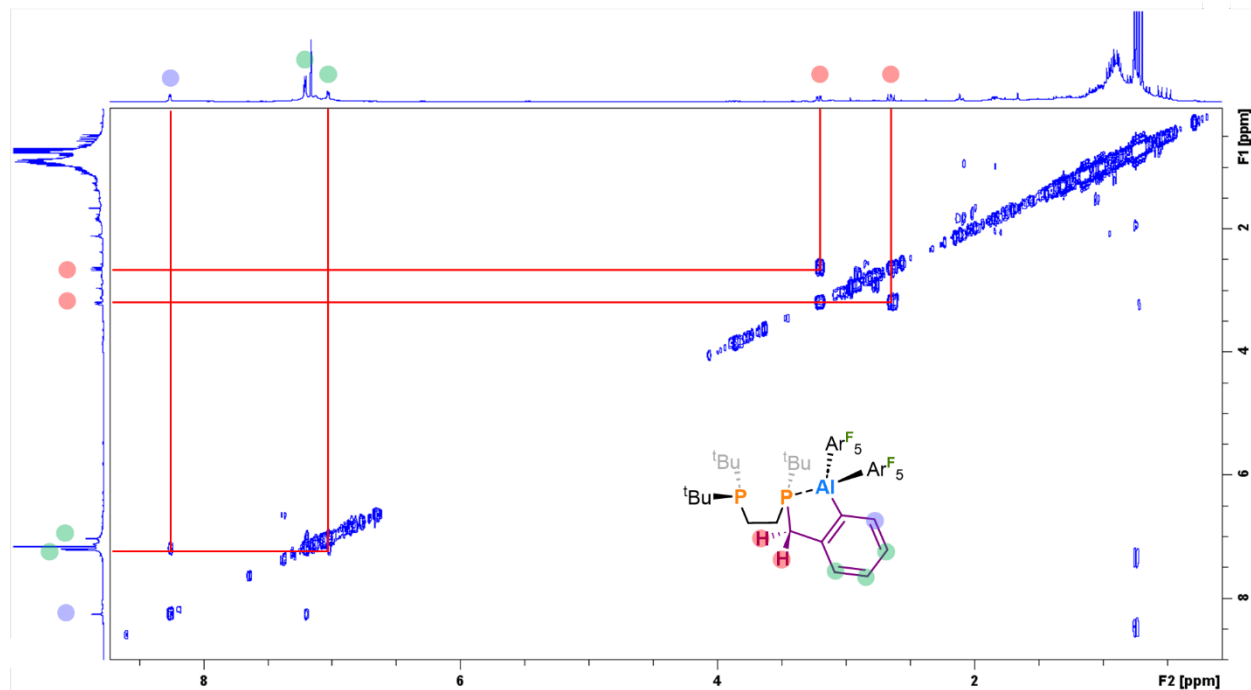

Figure S6. 3,  $^{31}\text{P}\{^1\text{H}\}$  NMR,  $\text{C}_6\text{D}_6$ , 162 MHz, 298 K.

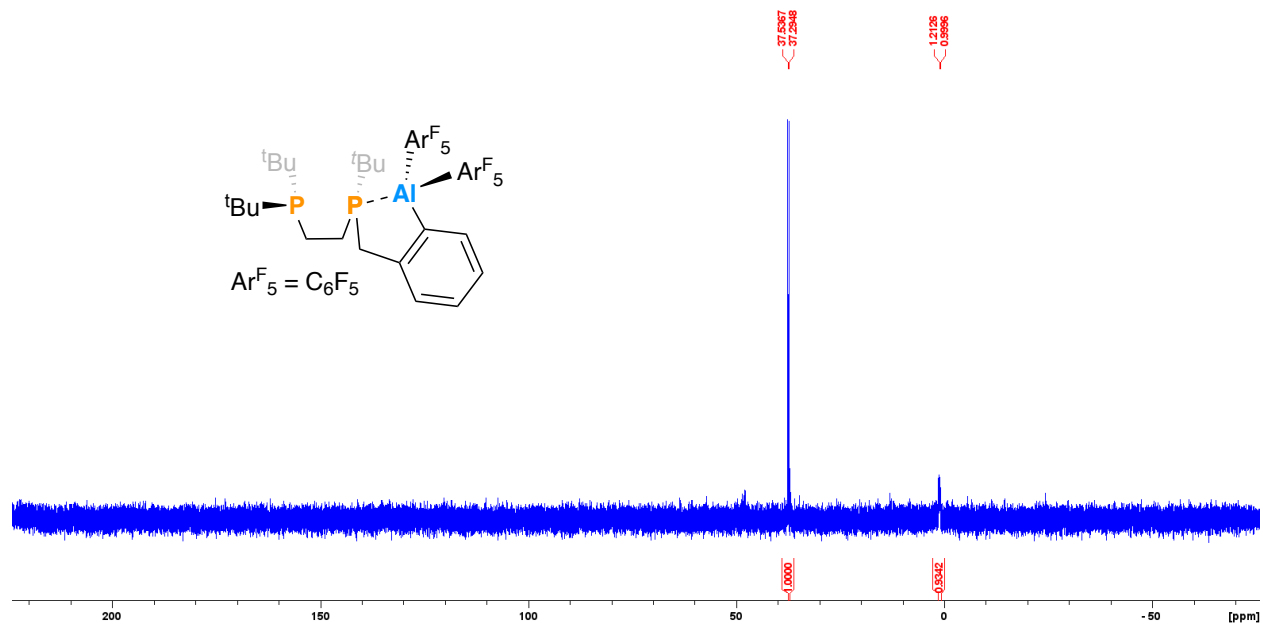

Figure S7. 3,  $^1\text{H}$ - $^{31}\text{P}$  HMBC NMR,  $\text{C}_6\text{D}_6$ , 600 MHz, 298 K.

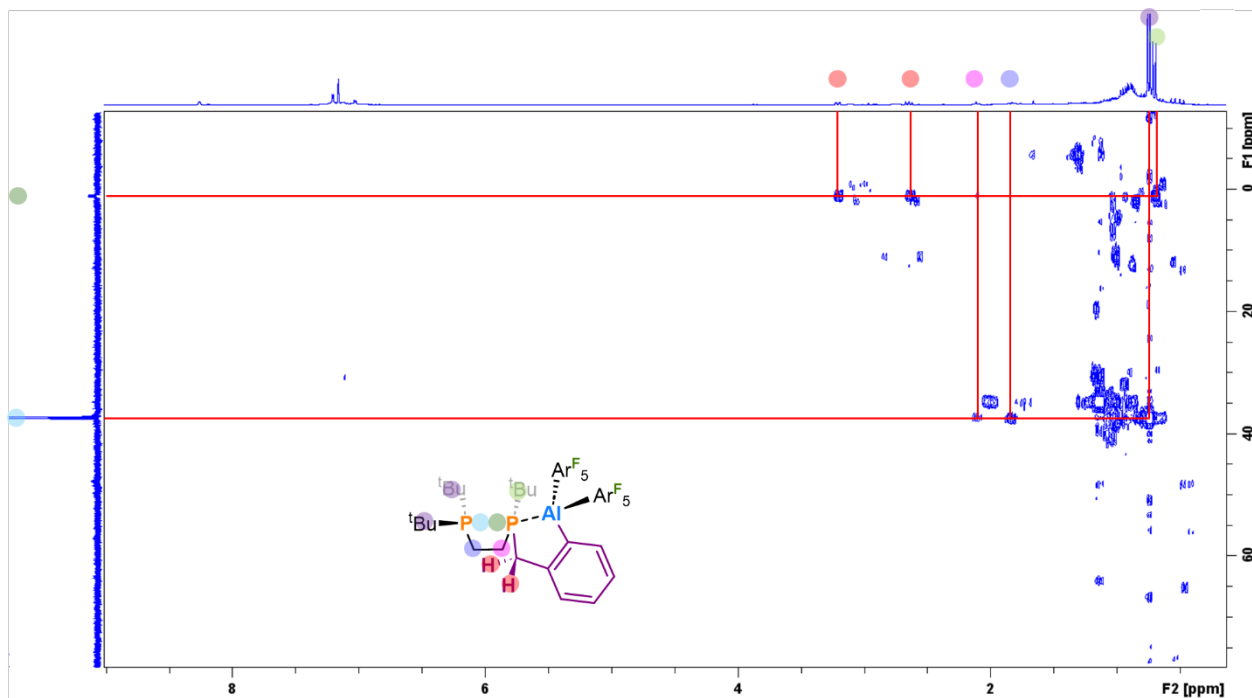

Figure S8. 3,  $^{19}\text{F}$  NMR,  $\text{C}_6\text{D}_6$ , 376 MHz, 298 K, \*= unknown impurity.

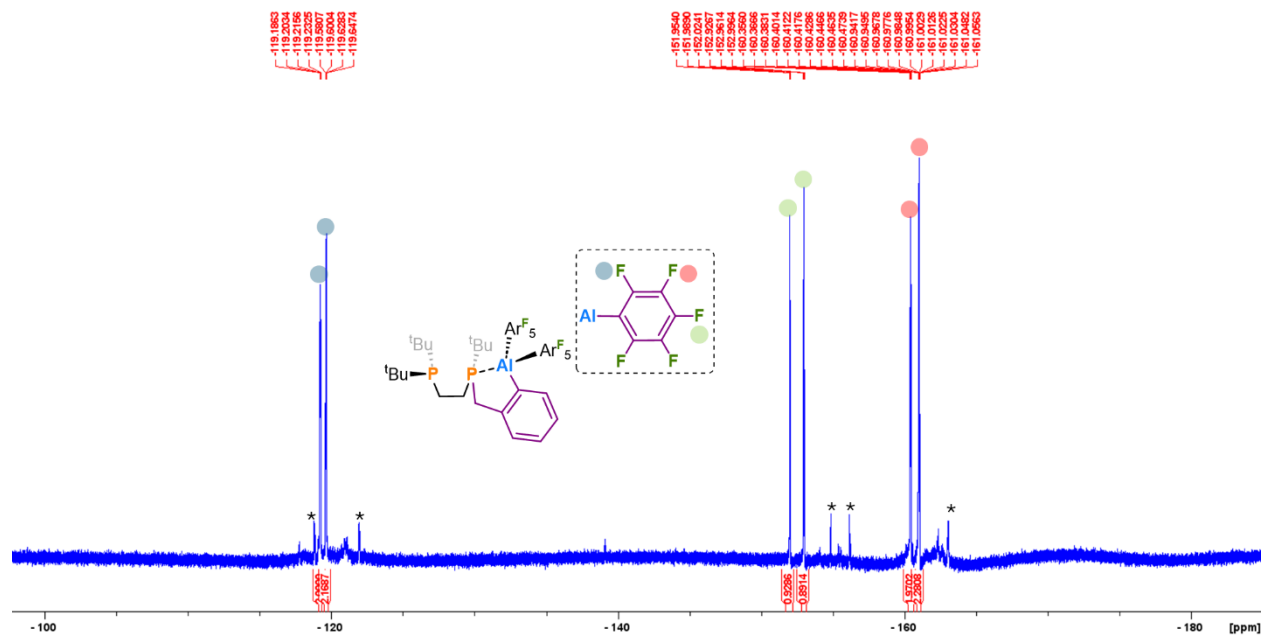

Figure S9. 3,  $^{19}\text{F}$ - $^{19}\text{F}$  COSY NMR,  $\text{C}_6\text{D}_6$ , 376 MHz, 298 K.

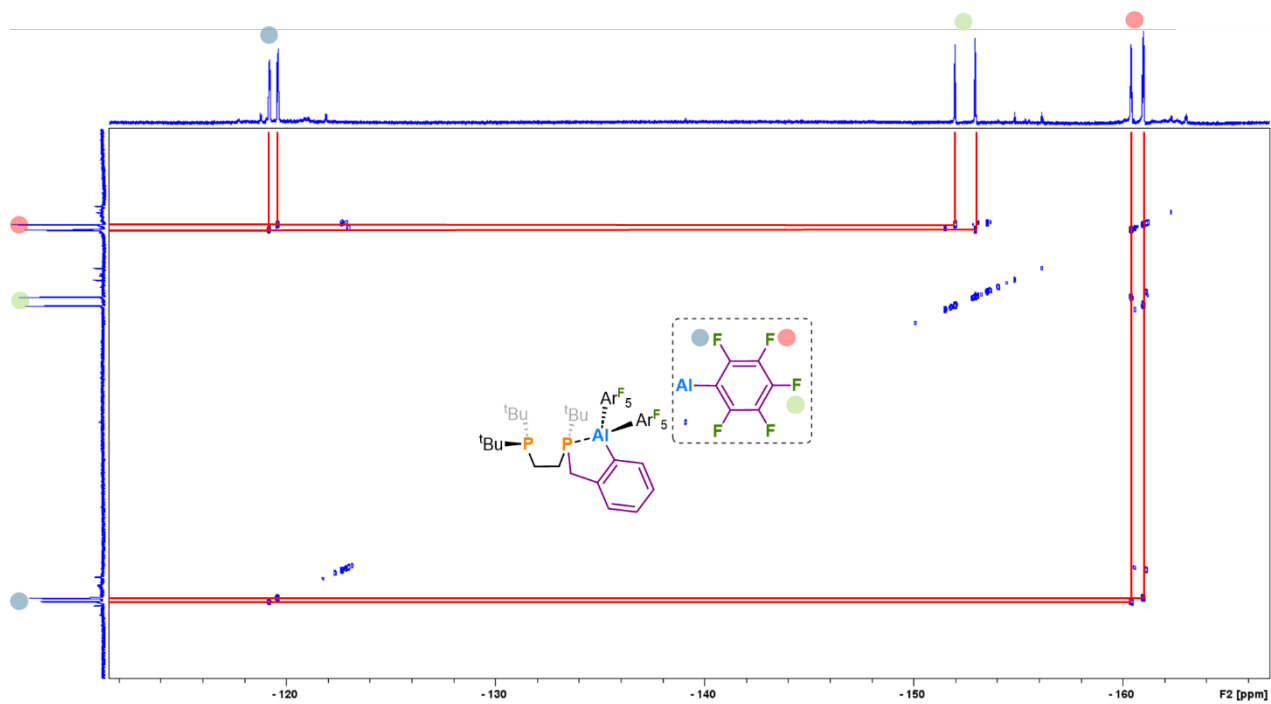

Figure S10. 3,  $^{13}\text{C}\{^1\text{H}\}$  NMR,  $\text{C}_6\text{D}_6$ , 376 MHz, 298 K.

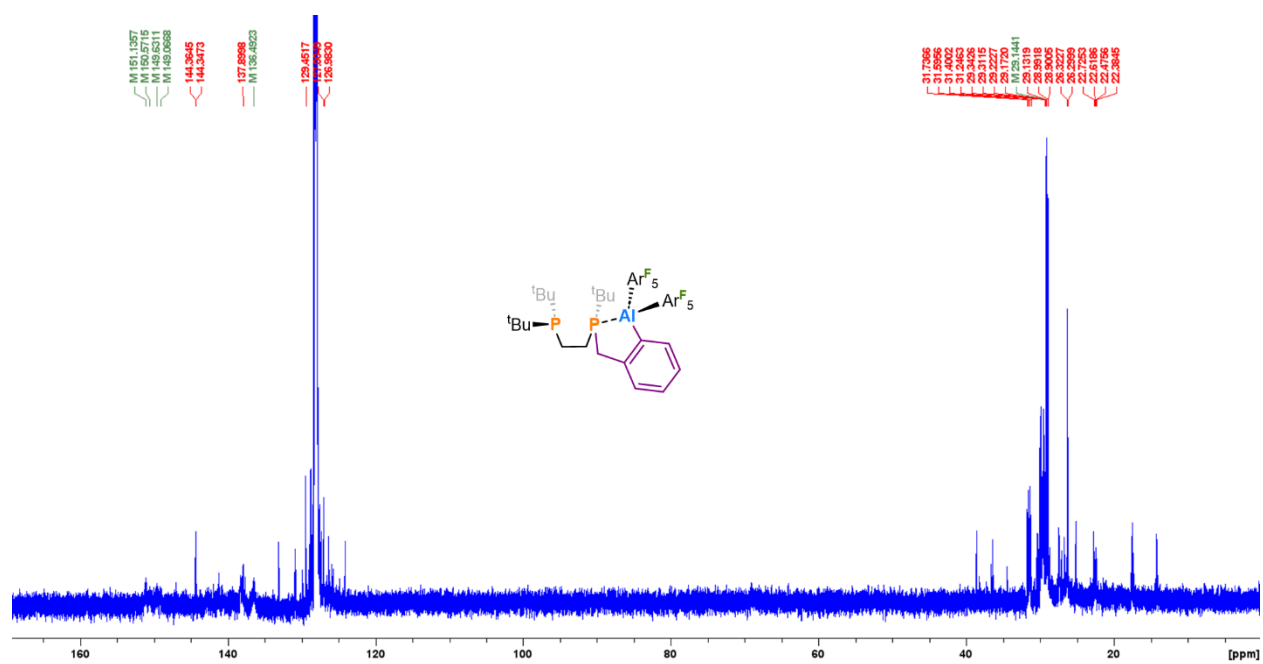

Figure S11. 3,  $^1\text{H}$ - $^{13}\text{C}$  HSQC NMR,  $\text{C}_6\text{D}_6$ , 376 MHz, 298 K.

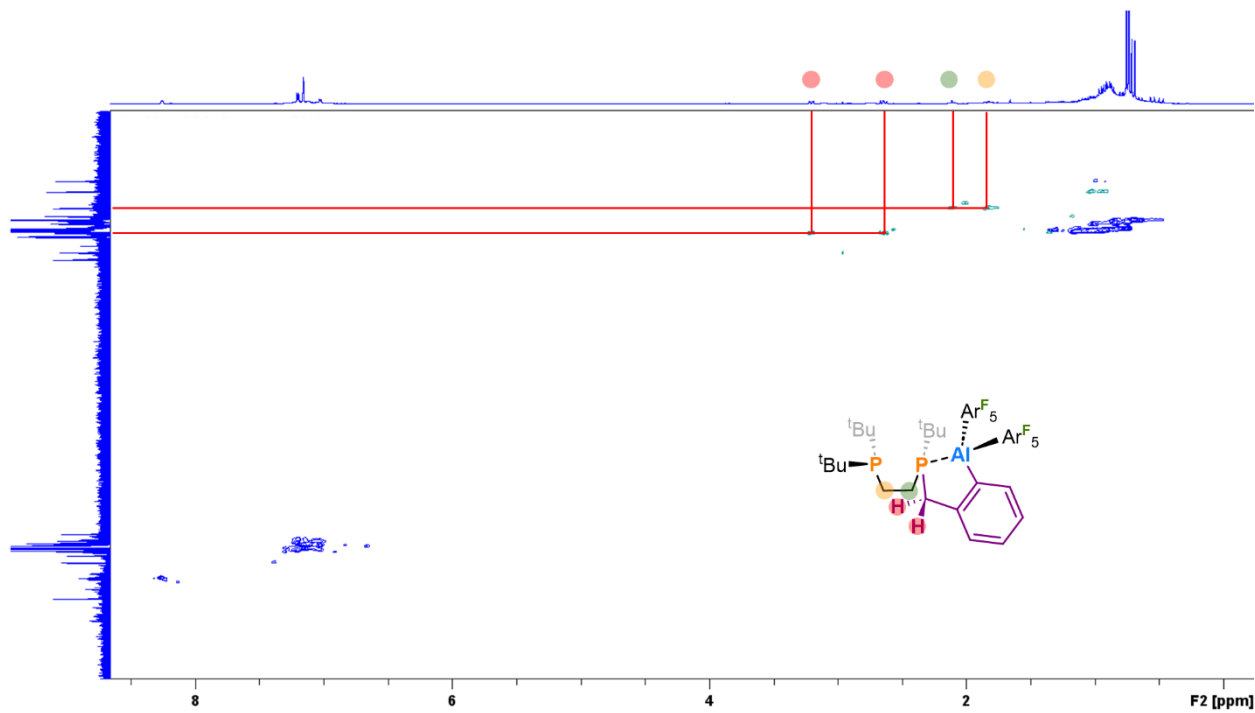

Figure S12. 3,  $^1\text{H}$ - $^{13}\text{C}$  HMBC NMR, Highlighting Aromatic Region,  $\text{C}_6\text{D}_6$ , 376 MHz, 298 K.

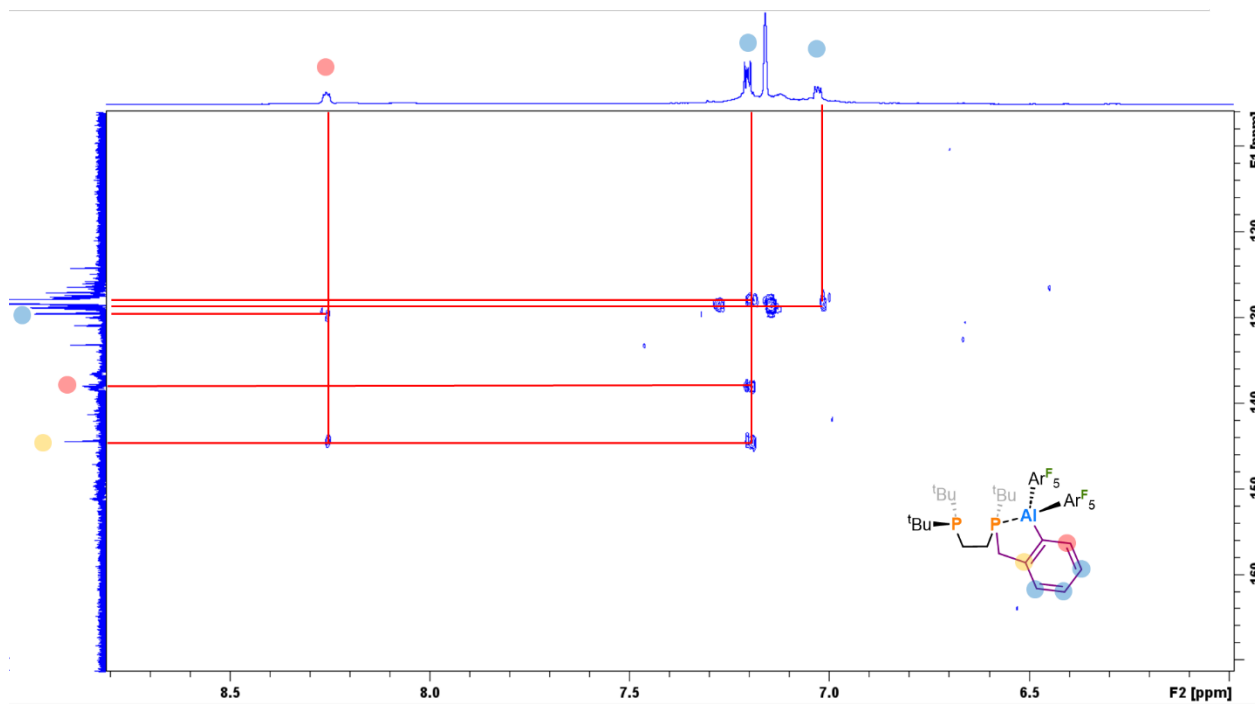

Figure S13. 3,  $^1\text{H}$ - $^{13}\text{C}$  HMBC NMR, Highlighting P( $t\text{Bu}$ ) Region,  $\text{C}_6\text{D}_6$ , 376 MHz, 298 K.

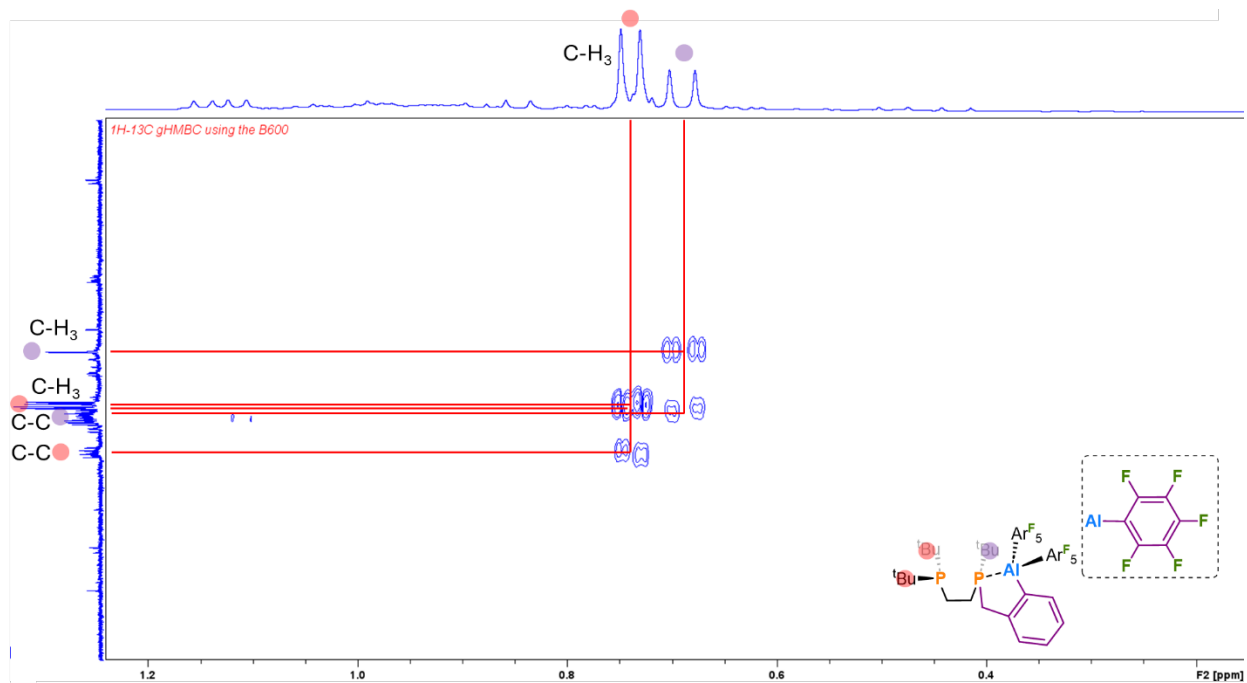

Figure S14. 3-pyr,  $^1\text{H}$  NMR,  $\text{C}_6\text{D}_6$ , 400 MHz, 298 K. \* =  $(t\text{Bu})_2\text{PCH}_2\text{CH}_2\text{P}(t\text{Bu})(\text{Bz})$ .

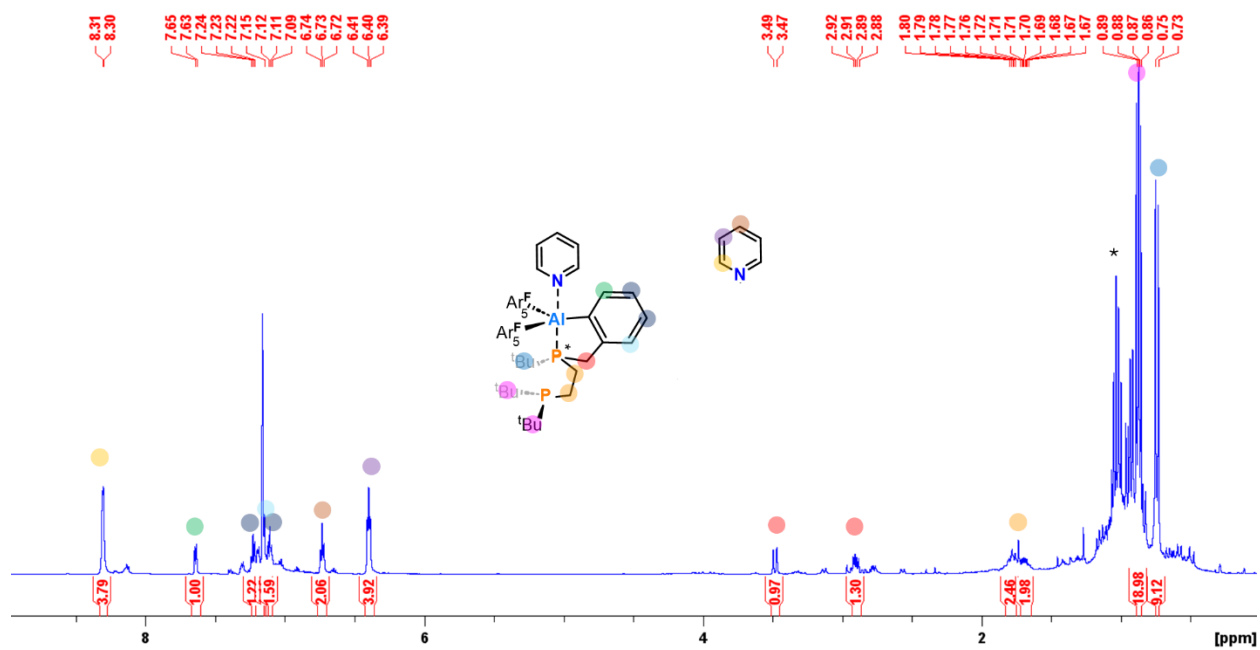

Figure S15. 3-pyr,  $^1\text{H}$ - $^1\text{H}$  COSY NMR,  $\text{C}_6\text{D}_6$ , 400 MHz, 298 K.

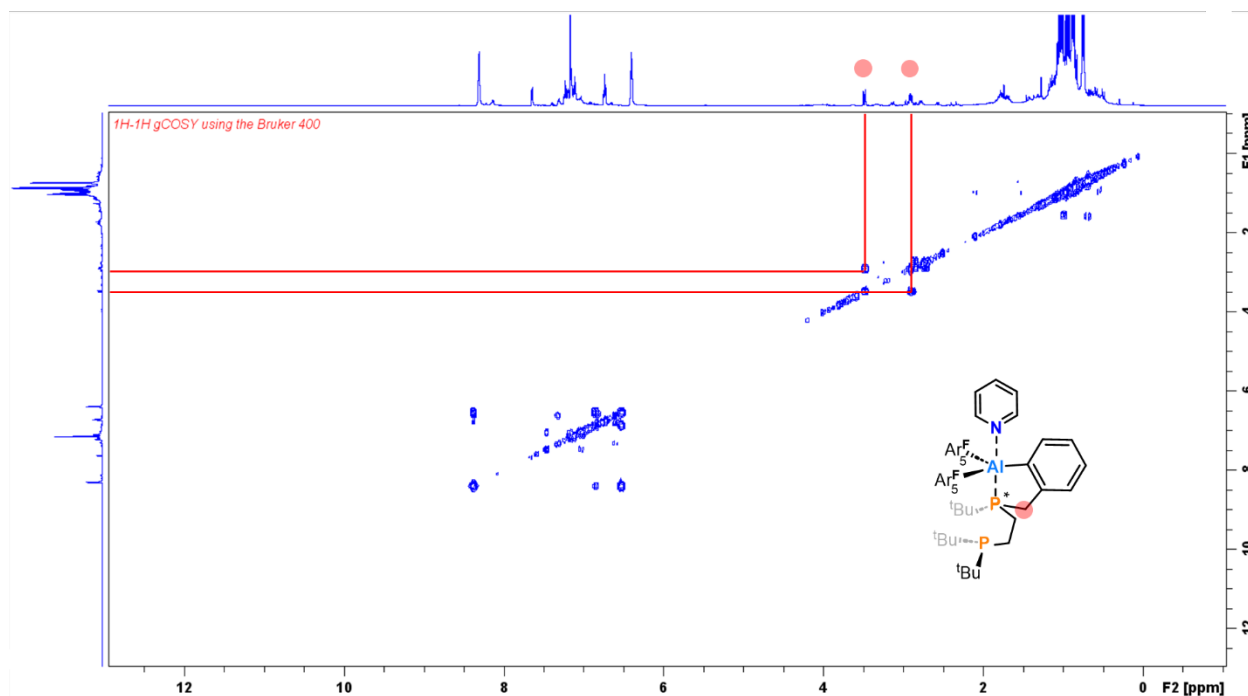

Figure S16. 3-pyr, 1D  $^1\text{H}$  TOCSY NMR, Irradiation at  $\delta_{\text{H}} = 3.48$  ppm,  $\text{C}_6\text{D}_6$ , 600 MHz, 298 K.

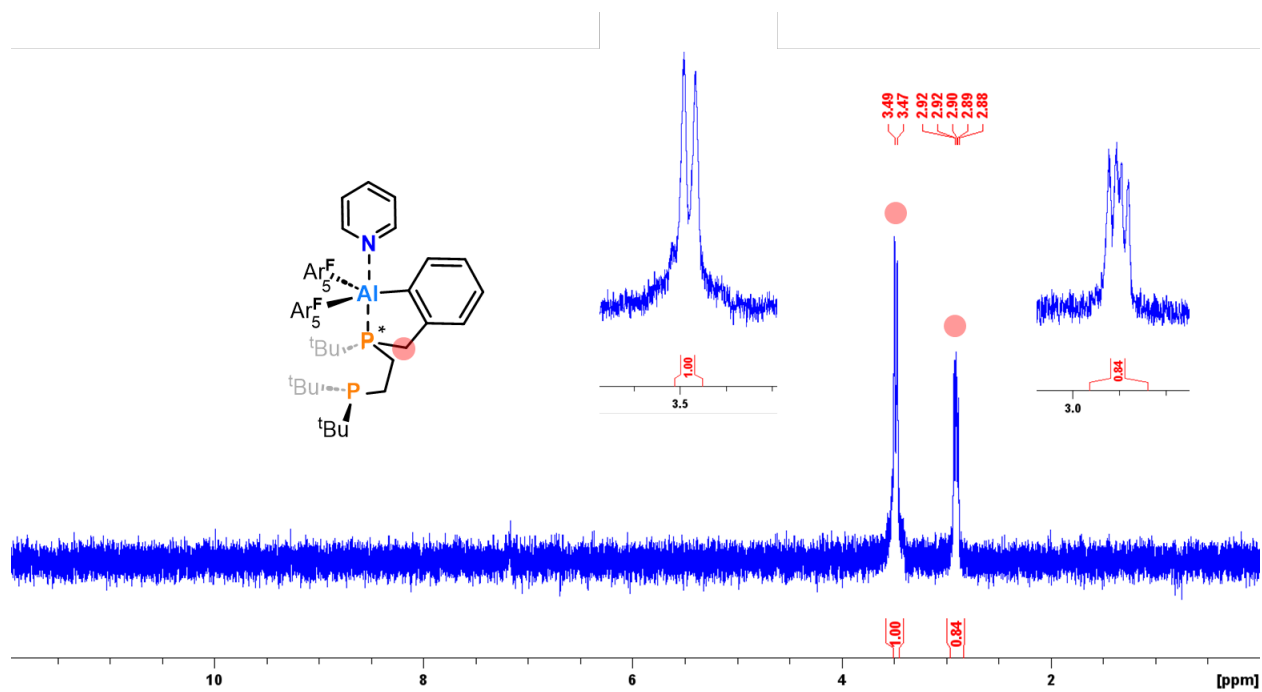

Figure S17. 3-pyr, 1D 1H TOCSY NMR, Irradiation at  $\delta_{\text{H}} = 7.64$  ppm,  $\text{C}_6\text{D}_6$ , 600 MHz, 298 K.

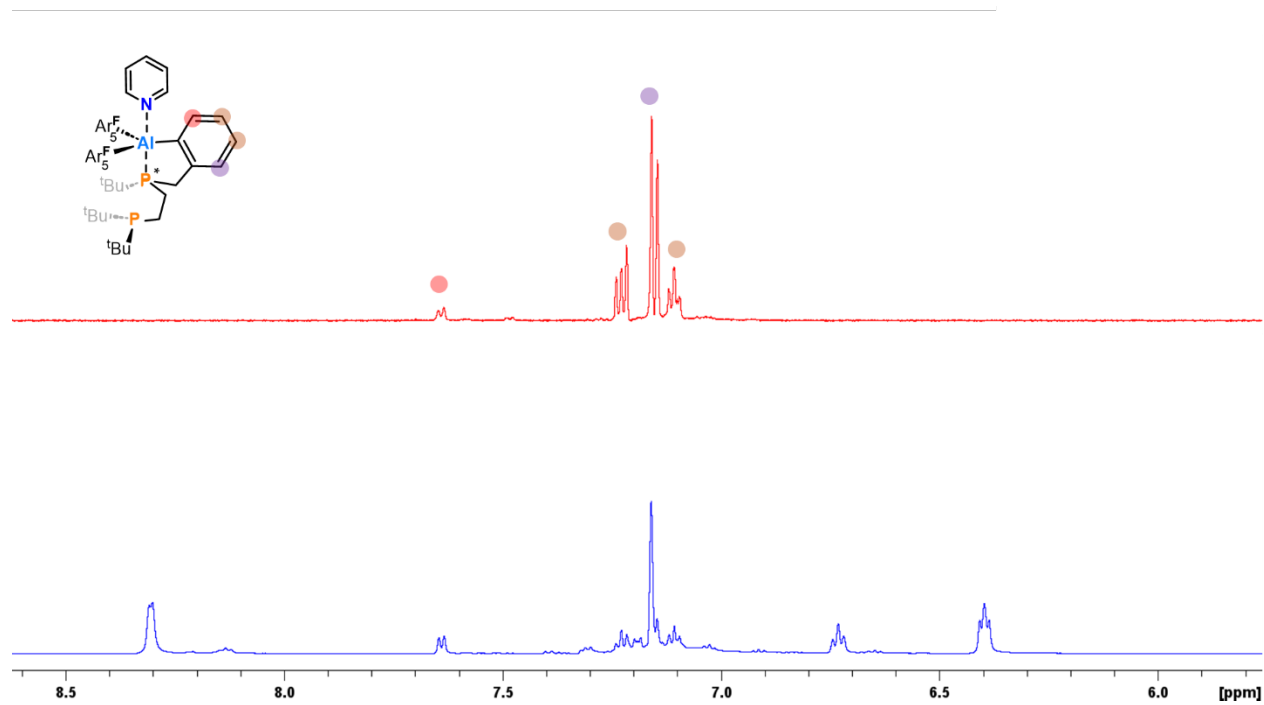

Figure S18. 3-pyr,  $^1\text{H}$  NMR, excess pyridine, 3-pyr post vacuum,  $\text{C}_6\text{D}_6$ , 600 MHz, 298 K.

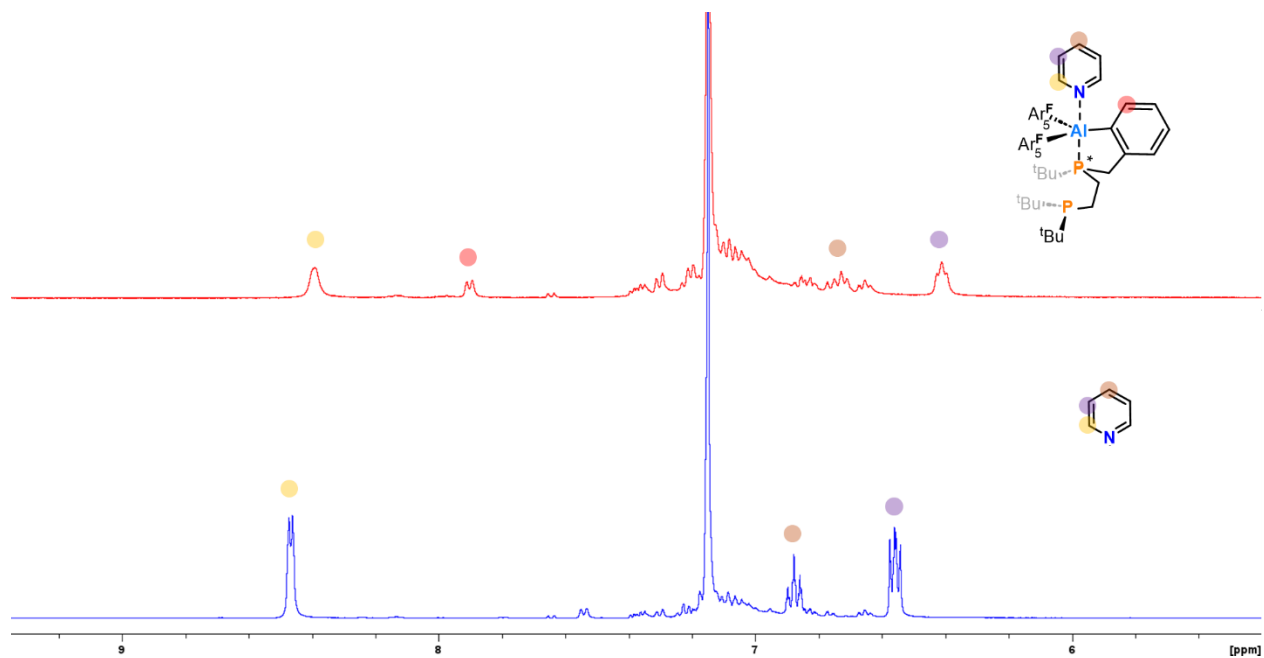

**Figure S19.** Generation of **3-pyr** (red) from **3** (blue) and removal of excess pyridine *in-vacuo* (green),  $^{31}\text{P}\{^1\text{H}\}$  NMR,  $\text{C}_6\text{D}_6$ , 162 MHz, 298 K. \*= Phosphine dimer  $[(\text{tBu})_2\text{PCH}_2\text{CH}_2\text{P}(\text{tBu})]_2$  carried through from synthesis of **2**, # =  $(\text{tBu})_2\text{PCH}_2\text{CH}_2\text{P}(\text{tBu})(\text{CH}_2\text{C}_6\text{H}_5)$ .

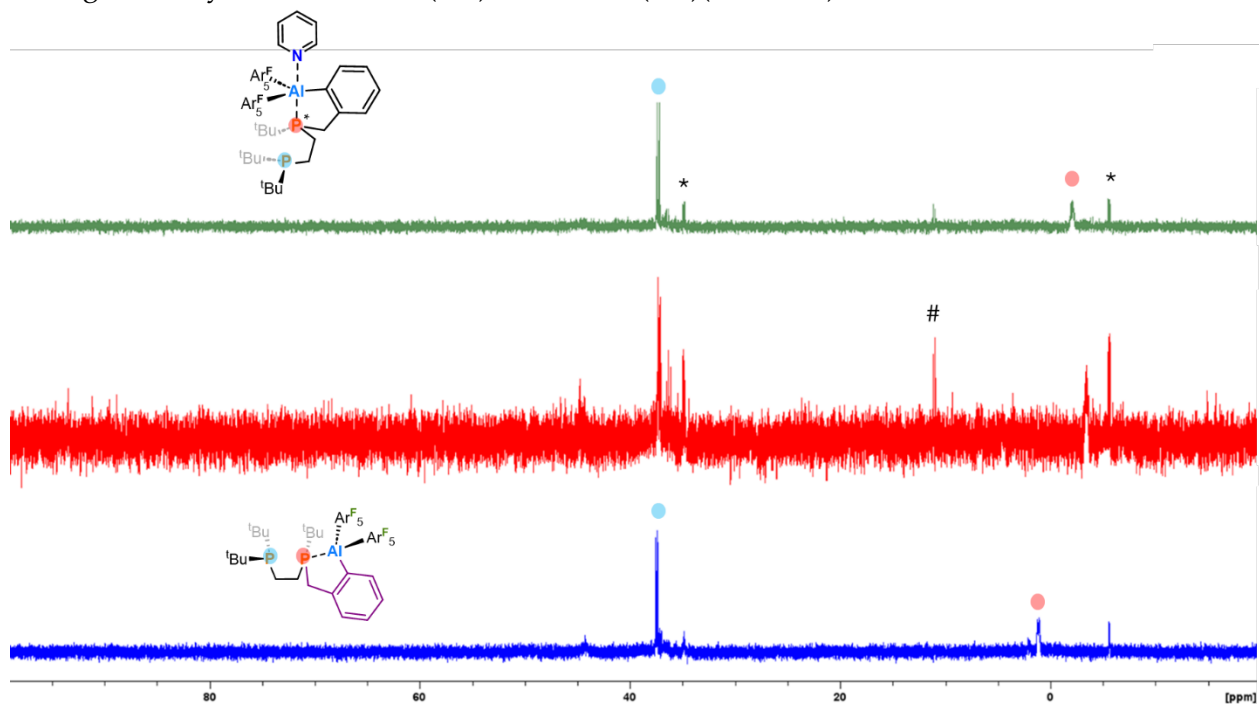

**Figure S20.** **3-pyr**,  $^{31}\text{P}\{^1\text{H}\}$  NMR,  $\text{C}_6\text{D}_6$ , 162 MHz, 298 K, \*= Phosphine dimer  $[(\text{tBu})_2\text{PCH}_2\text{CH}_2\text{P}(\text{tBu})]_2$  carried through from synthesis of **2**, # =  $(\text{tBu})_2\text{PCH}_2\text{CH}_2\text{P}(\text{tBu})(\text{CH}_2\text{C}_6\text{H}_5)$ .

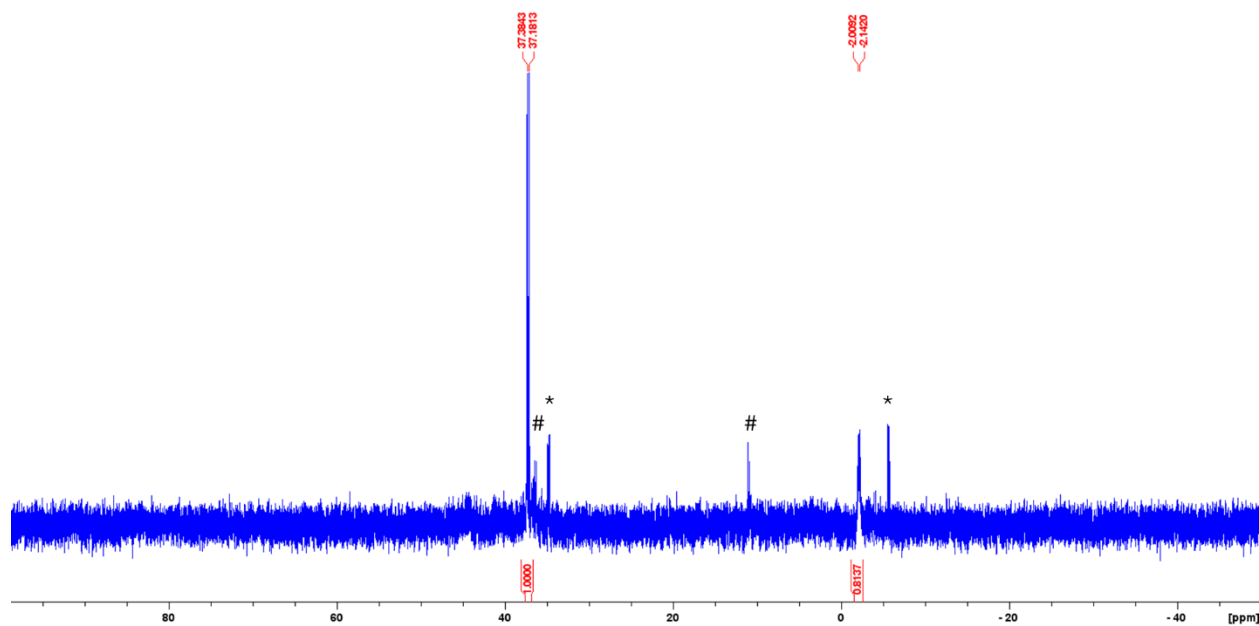

Figure S21. 3-pyr,  $^1\text{H}$ - $^{31}\text{P}$  HMBC NMR,  $\text{C}_6\text{D}_6$ , 400 MHz, 298 K.

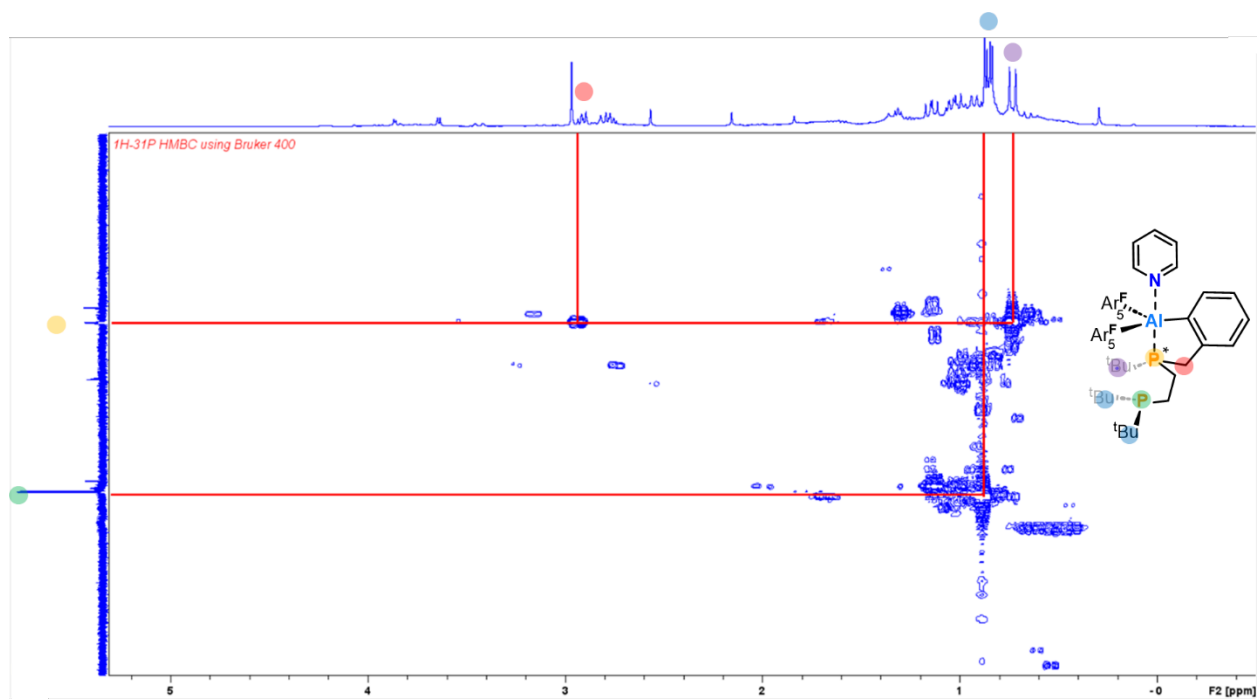

Figure S22. Generation of 3-pyr (red) from 3 (blue),  $^{19}\text{F}$  NMR,  $\text{C}_6\text{D}_6$ , 376 MHz, 298 K.

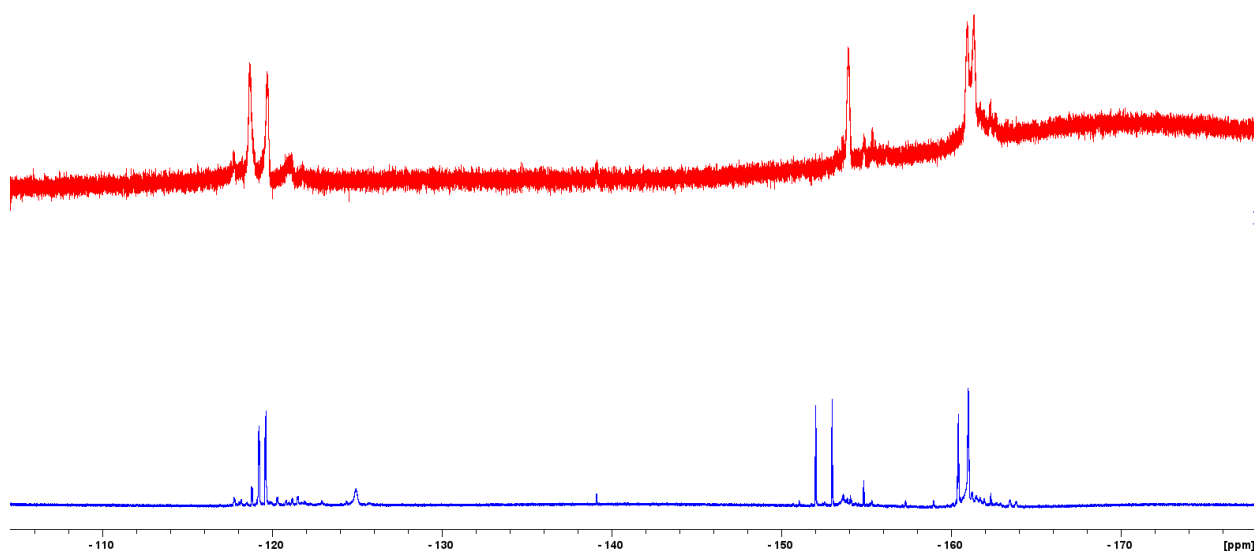

Figure S23. 3-pyr,  $^{19}\text{F}$  NMR,  $\text{C}_6\text{D}_6$ , 376 MHz, 298 K.

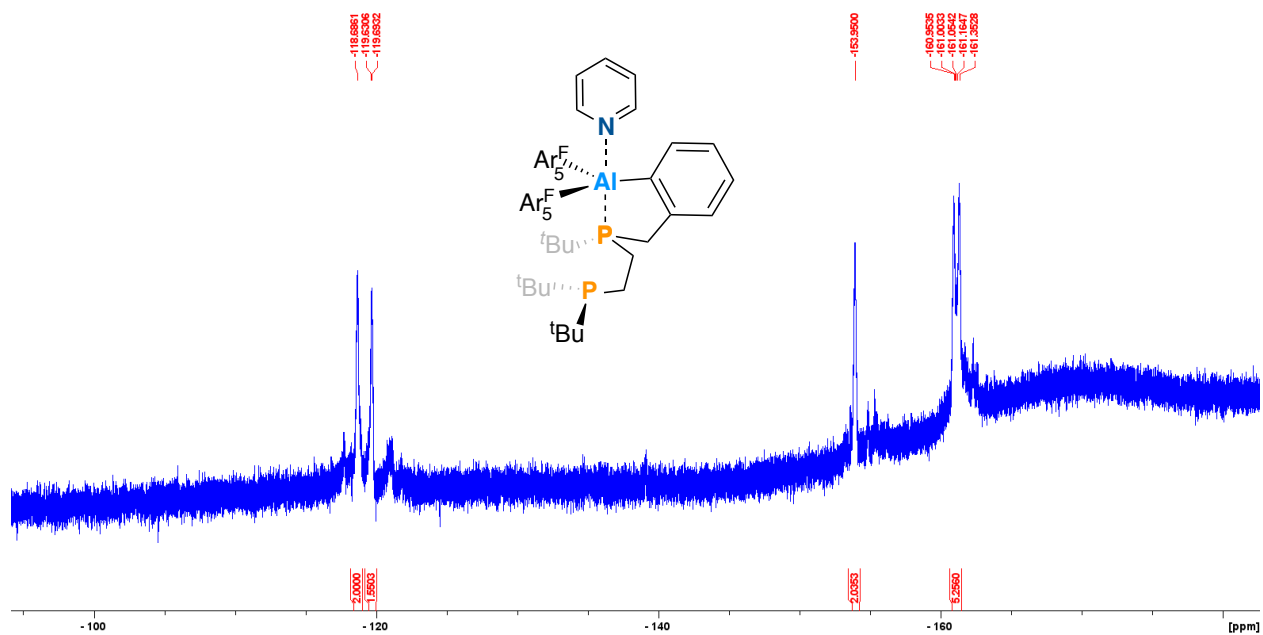

Figure S24. 3-THF,  $^{31}\text{P}\{^1\text{H}\}$  NMR,  $\text{C}_6\text{D}_6$ , 162 MHz, 298 K. Addition of excess THF (red) and removal *in-vacuo* (green). \* = Phosphine dimer  $[(^t\text{Bu})_2\text{PCH}_2\text{CH}_2\text{P}(^t\text{Bu})]_2$  carried through from synthesis of 2, # =  $(^t\text{Bu})_2\text{PCH}_2\text{CH}_2\text{P}(^t\text{Bu})(\text{CH}_2\text{C}_6\text{H}_5)$ .

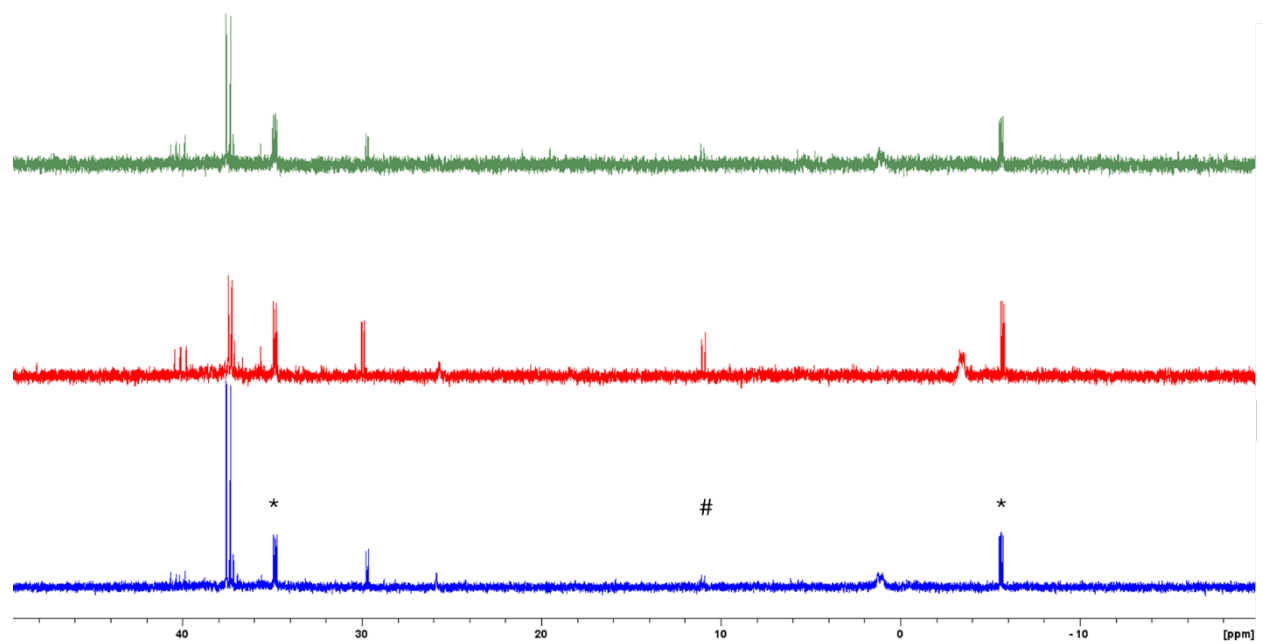

Figure S25. 3-THF,  $^{19}\text{F}$  NMR,  $\text{C}_6\text{D}_6$ , 376 MHz, 298 K. Complex 3 (blue), addition of excess THF to 3 (red) to give 3-THF, and removal of THF *in-vacuo* and re-dissolution in  $\text{C}_6\text{D}_6$  (green), which shows return of 3.

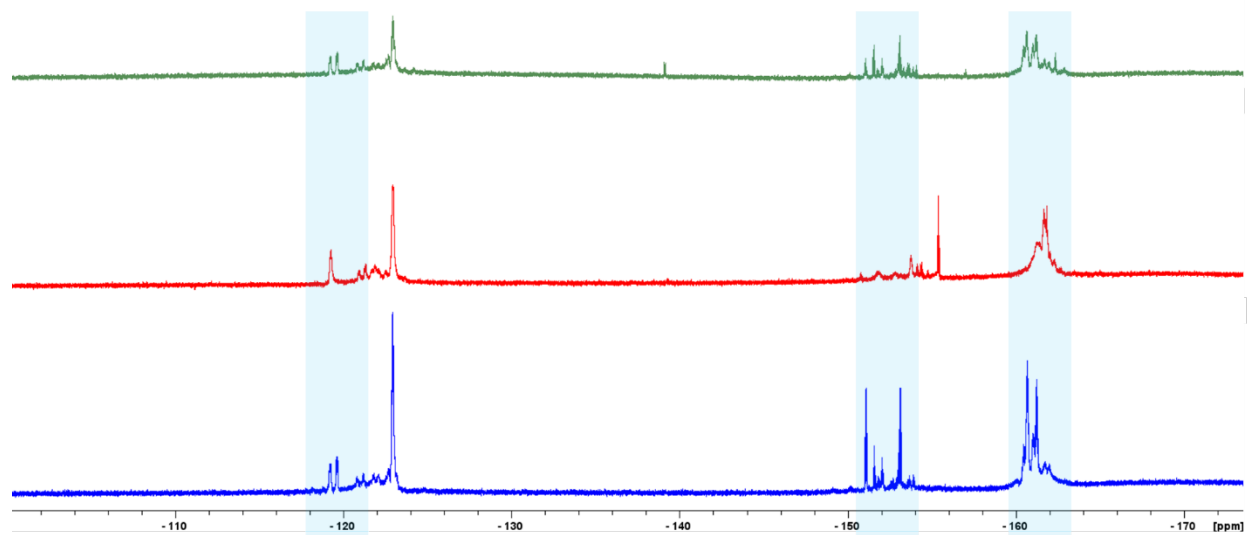

Figure S26. 4-pyr,  $^1\text{H}$  NMR,  $\text{C}_6\text{D}_6$ , 400 MHz, 298 K.

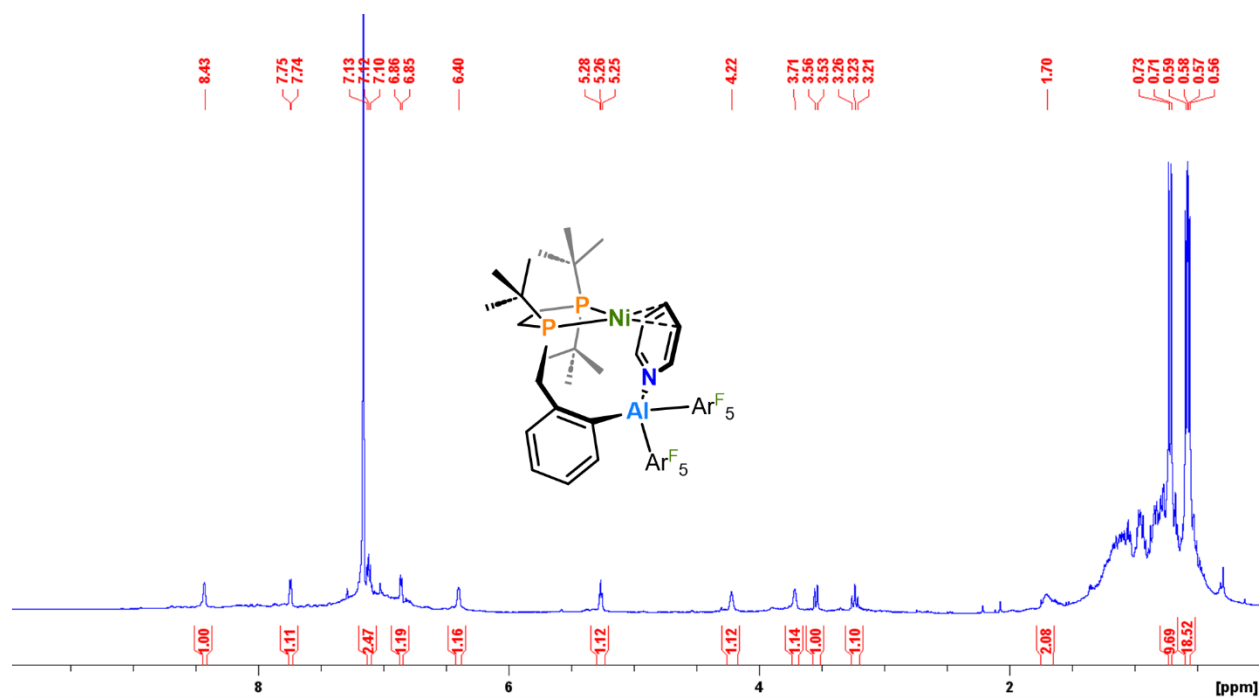

Figure S27. 4-pyr,  $^1\text{H}$ - $^1\text{H}$  COSY NMR,  $\text{C}_6\text{D}_6$ , 400 MHz, 298 K.

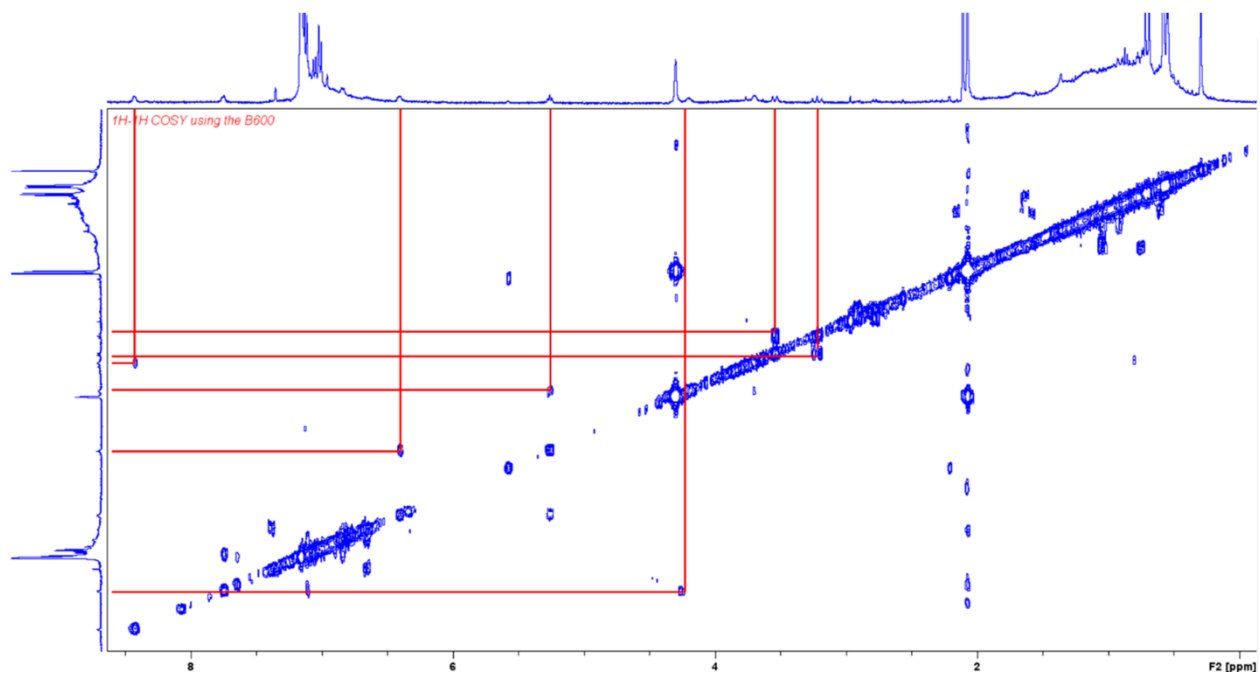

Figure S28. 4-pyr, 1D  $^1\text{H}$  TOCSY NMR, Irradiation at  $\delta_{\text{H}} = 8.43$  ppm,  $\text{C}_6\text{D}_6$ , 600 MHz, 298 K.

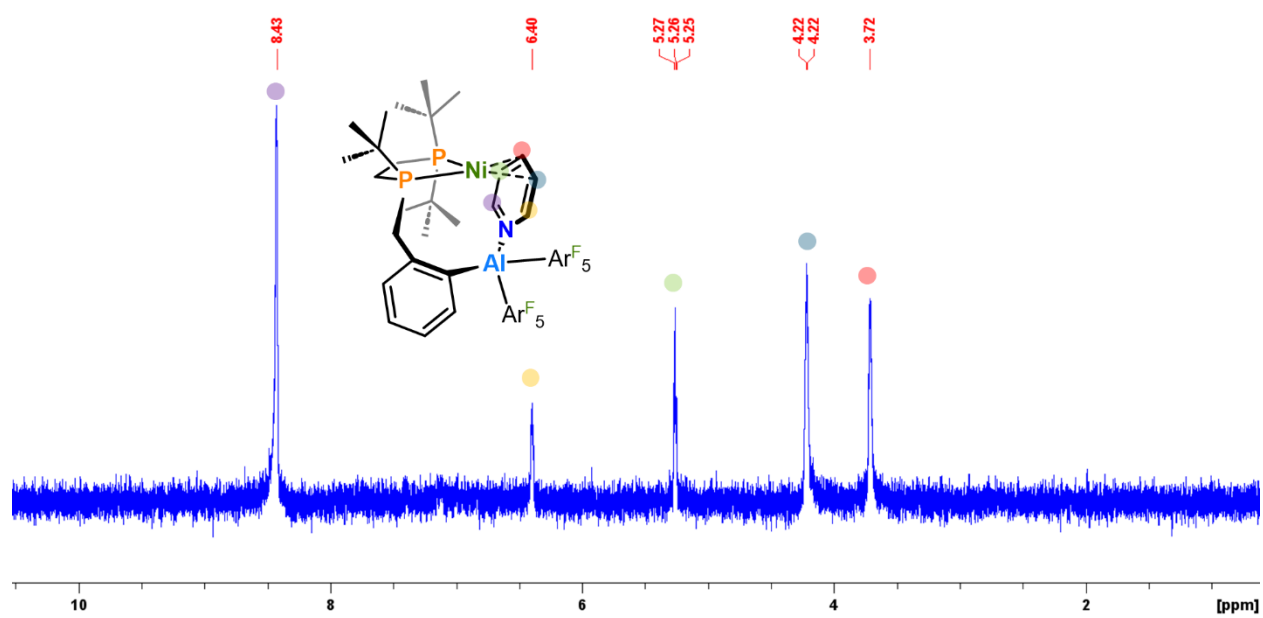

Figure S29. 4-pyr, VT- $^1\text{H}$  NMR,  $\text{tol-d}_8$ , 400 MHz.

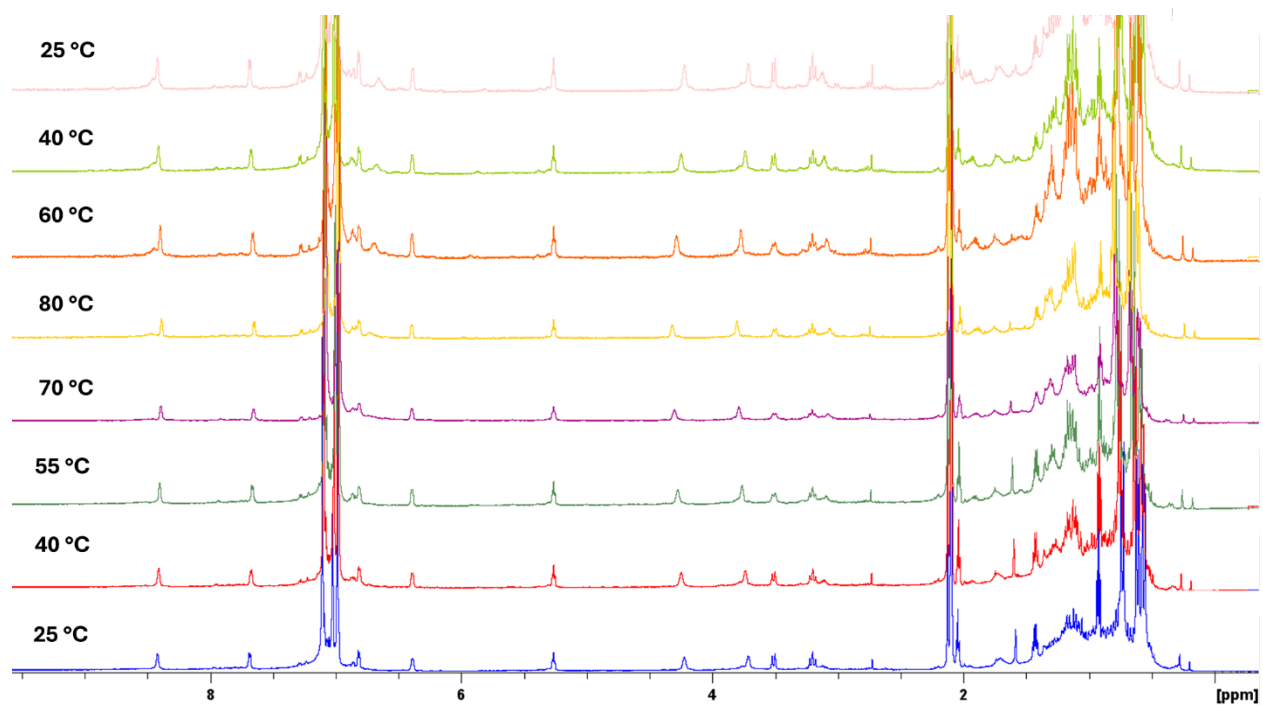

Figure S30. 4-pyr,  $^{31}\text{P}\{^1\text{H}\}$  NMR,  $\text{C}_6\text{D}_6$ , 162 MHz, 298 K.

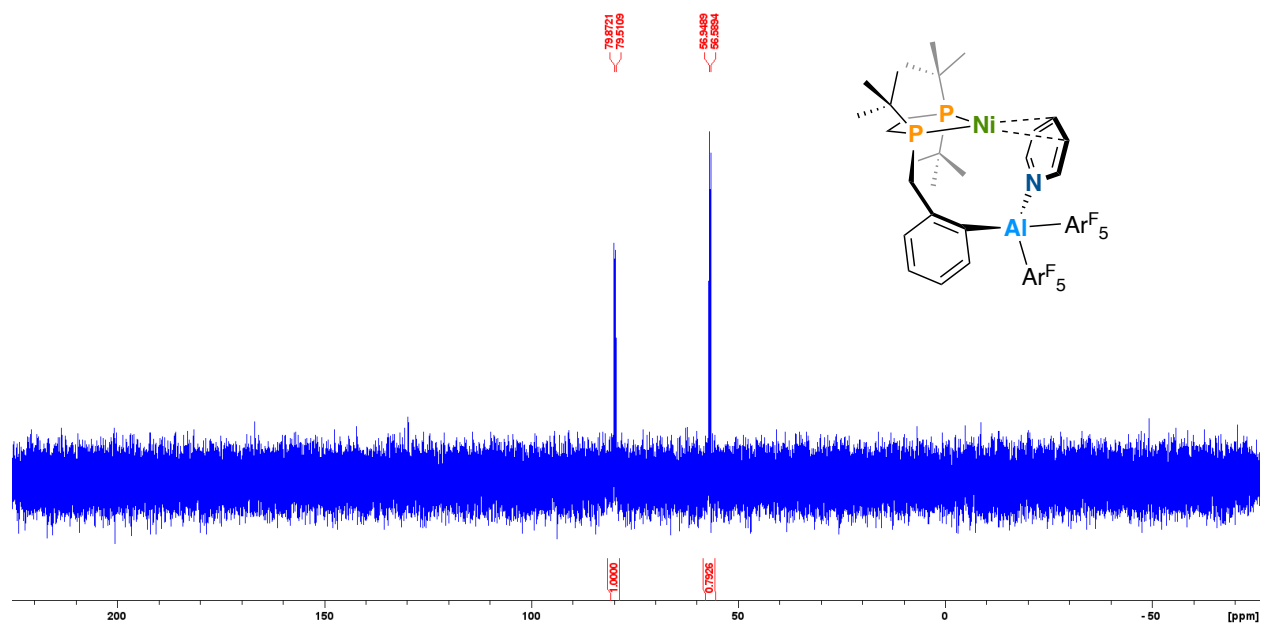

Figure S31. 4-pyr,  $^{31}\text{P}$  NMR, tol-ds, 162 MHz, Variable Temperature.

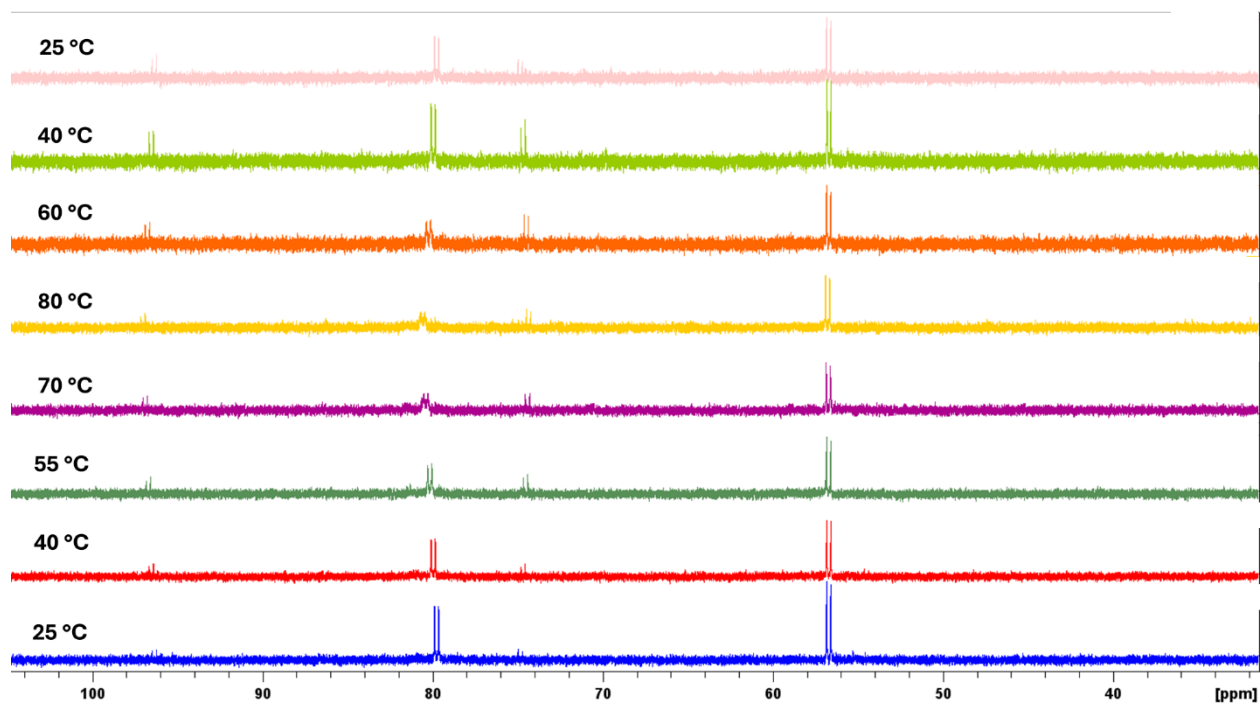

Figure S32. 4-pyr,  $^1\text{H}$ - $^{31}\text{P}$  HMBC NMR,  $\text{C}_6\text{D}_6$ , 400 MHz, 298 K.

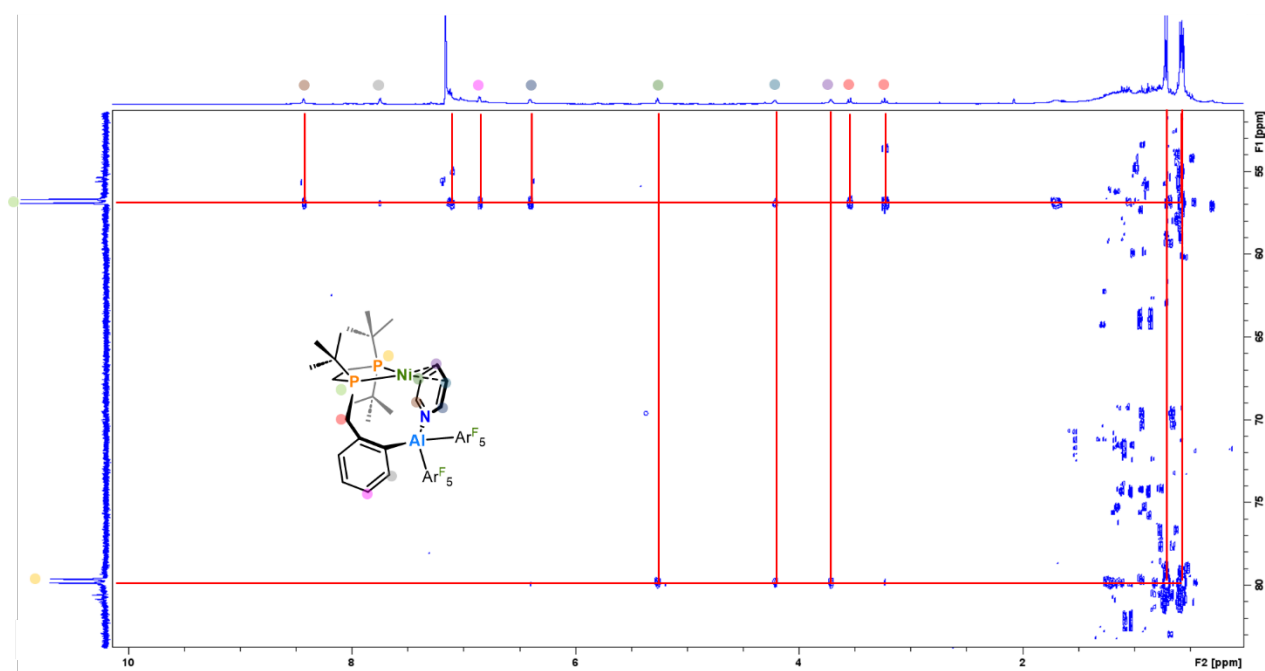

Figure S33. 4-pyr,  $^{19}\text{F}$  NMR,  $\text{C}_6\text{D}_6$ , 150 MHz, 298 K.

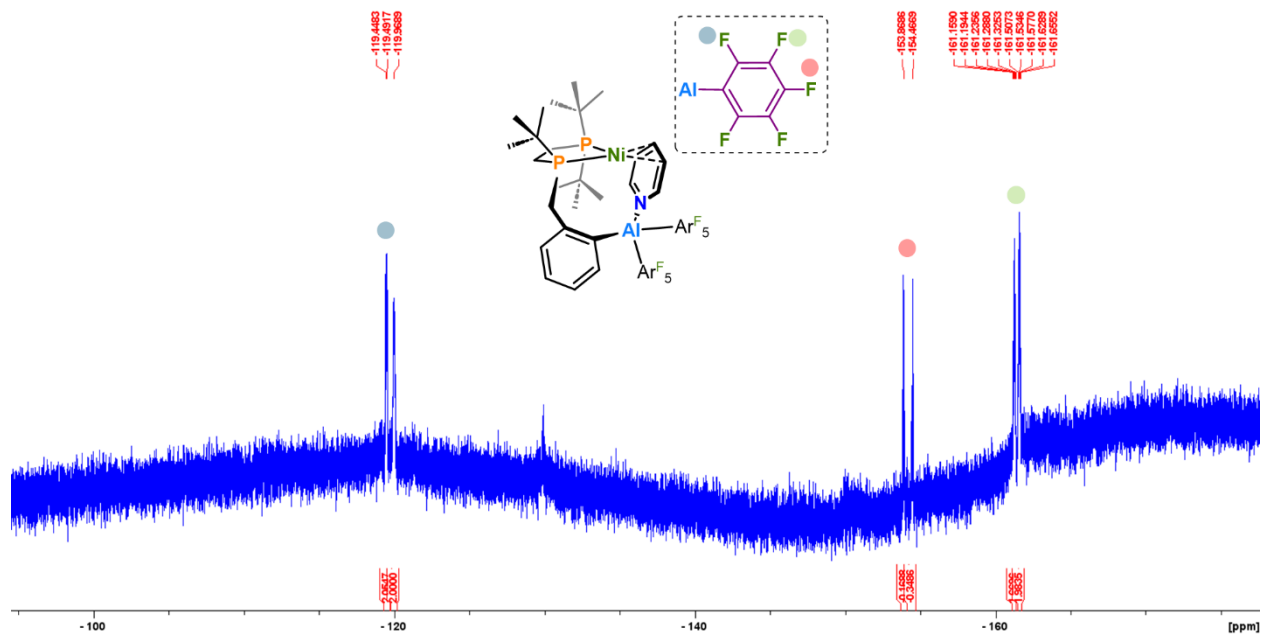

Figure S34. 4-pyr,  $^{13}\text{C}\{^1\text{H}\}$  NMR,  $\text{C}_6\text{D}_6$ , 150 MHz, 298 K.

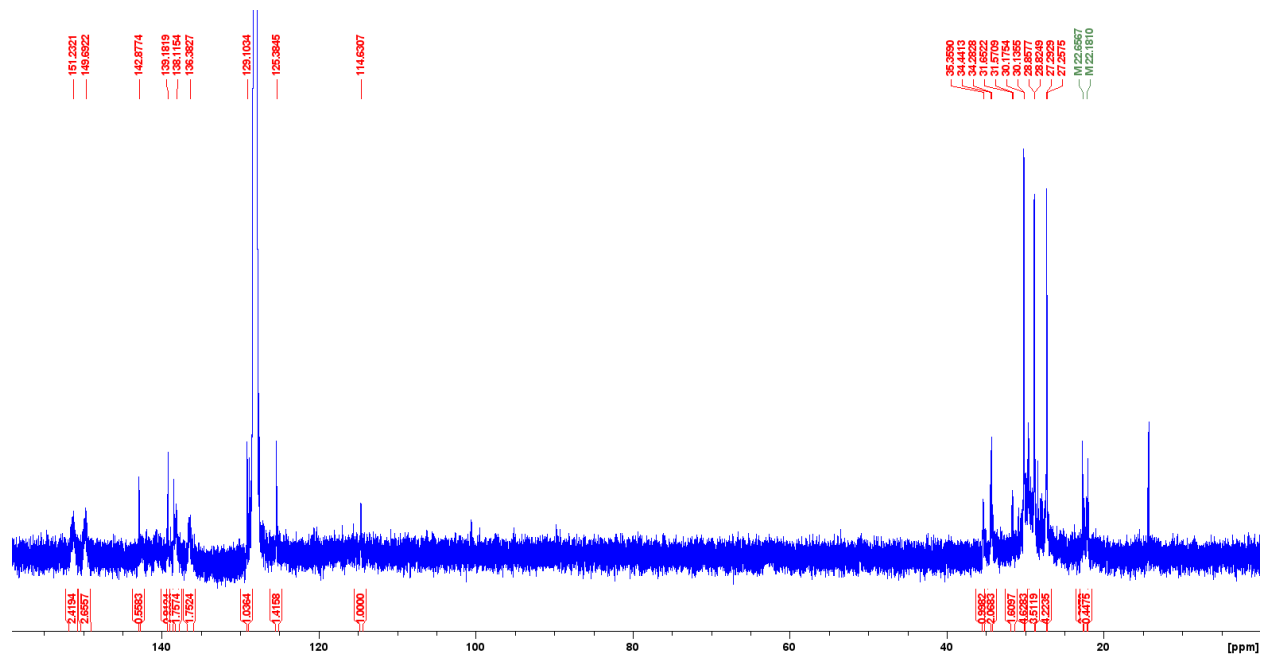

Figure S35. 4-pyr,  $^1\text{H}$ - $^{13}\text{C}$  HSQC,  $\text{C}_6\text{D}_6$ , 600 MHz, 298 K.

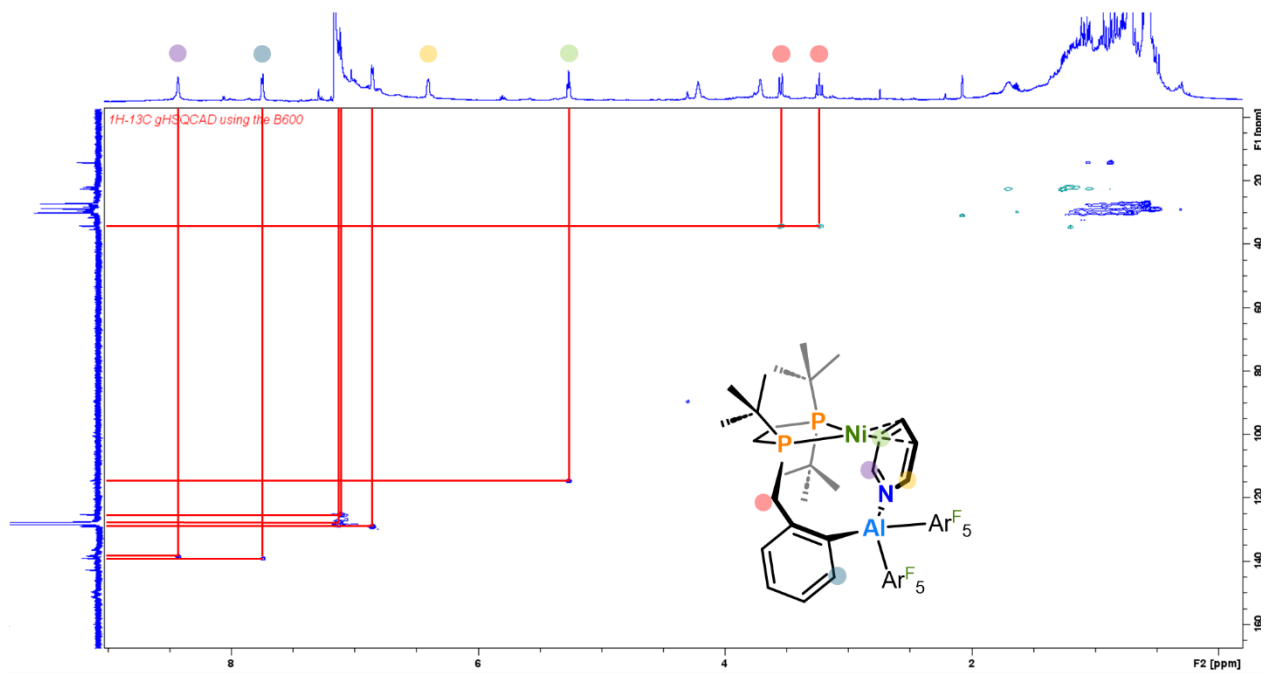

Figure S36. 4-pyr- $\text{d}_5$ ,  $^1\text{H}$  NMR,  $\text{C}_6\text{D}_6$ , 400 MHz, 298 K.

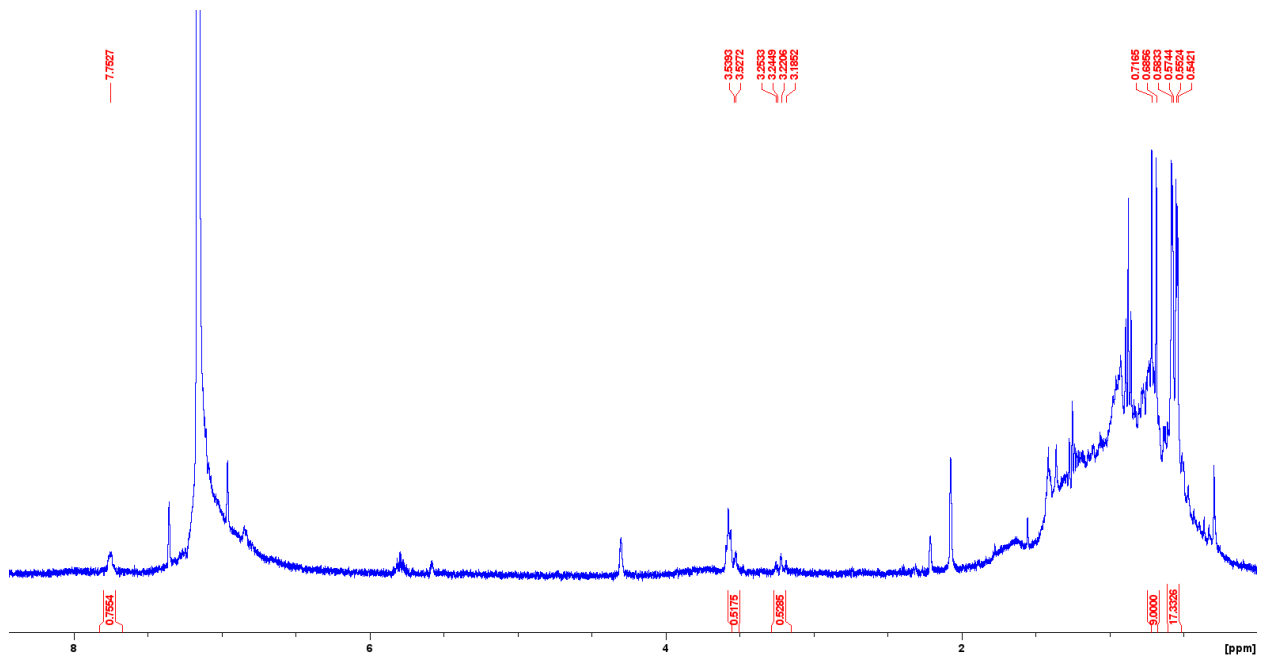

**Figure S37.** 4-pyr-d<sub>5</sub>, <sup>1</sup>H NMR, C<sub>6</sub>D<sub>6</sub>, 400 MHz, 298 K, showing pyr signals are missing due to deuteration.

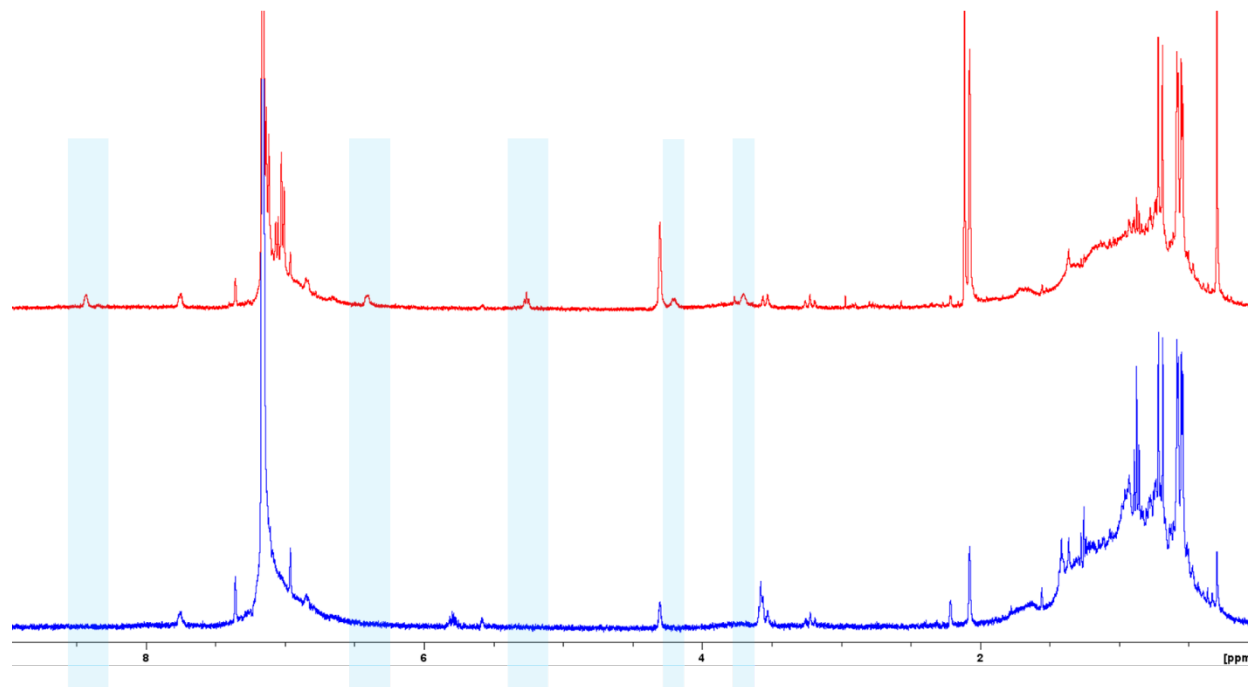

**Figure S38.** 4-pyr-d<sub>5</sub>, <sup>31</sup>P{<sup>1</sup>H} NMR, C<sub>6</sub>D<sub>6</sub>, 162 MHz, 298 K.

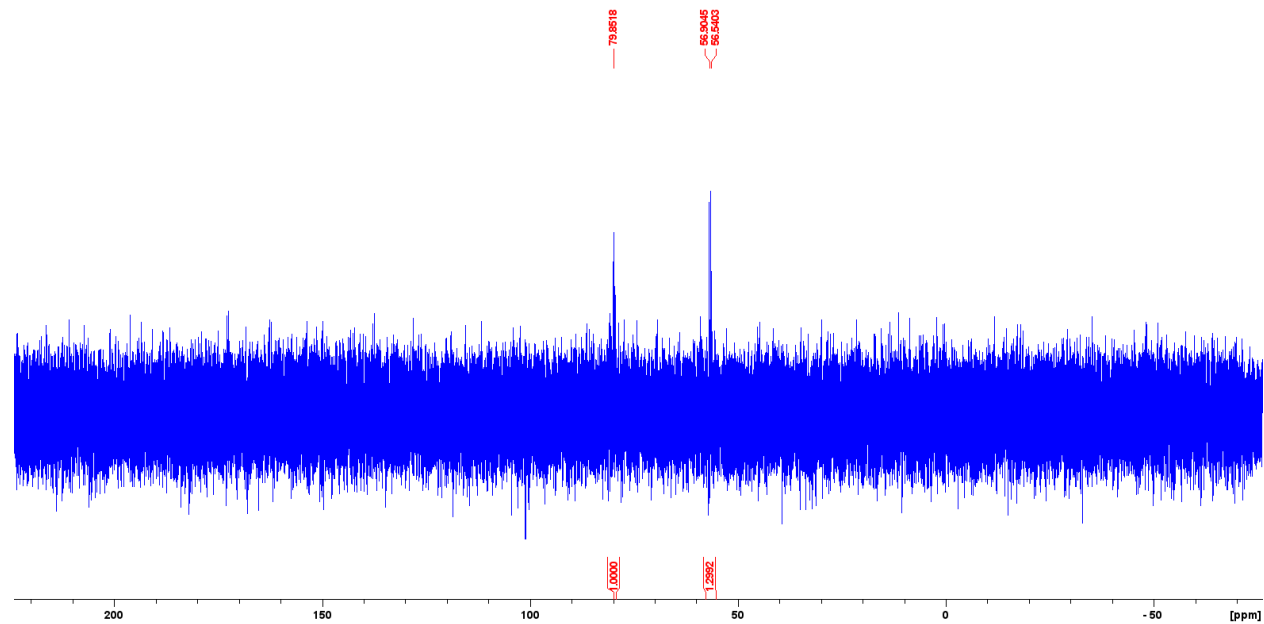

Figure S39. 5-quin,  $^1\text{H}\{^{31}\text{P}\}$  NMR,  $\text{C}_6\text{D}_6$ , 400 MHz, 298 K.

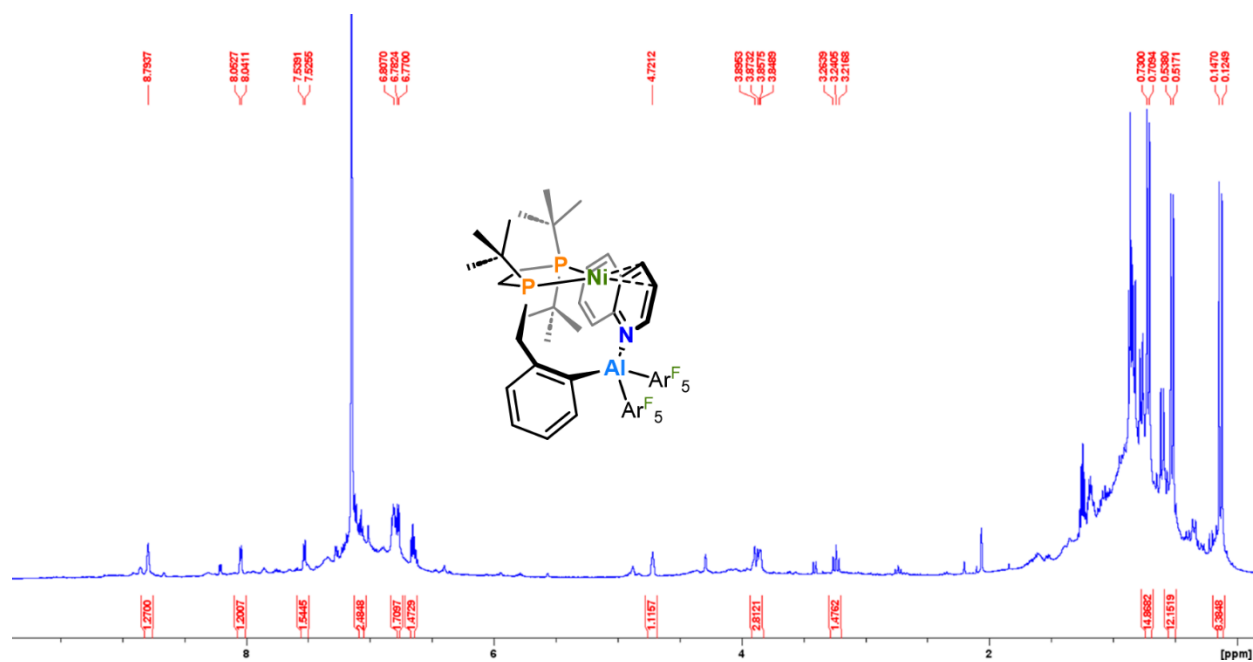

Figure S40. 5-quin,  $^1\text{H}\text{-}^1\text{H}$  COSY NMR,  $\text{C}_6\text{D}_6$ , 400 MHz, 298 K.

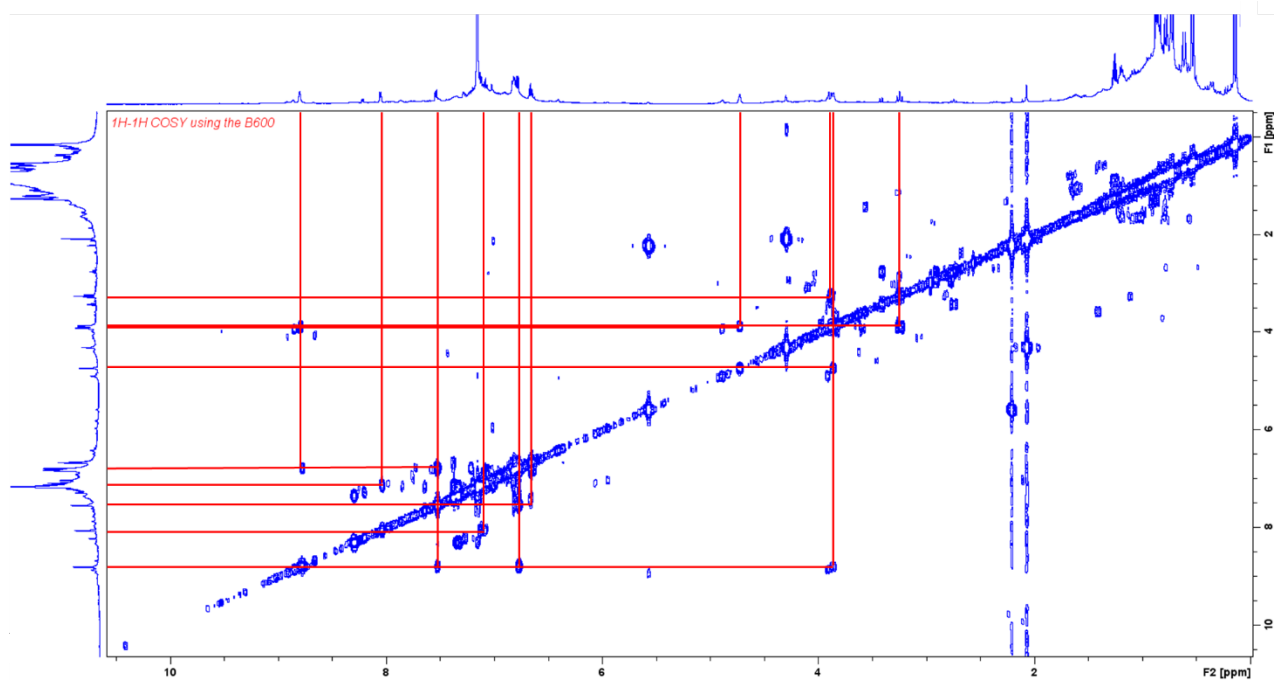

**Figure S41.** 5-Quin, 1D  $^1\text{H}$  TOCSY NMR, Irradiation at  $\delta_{\text{H}} = 4.73$  ppm (Red), 7.53 ppm (Green),  $\text{C}_6\text{D}_6$ , 600 MHz, 298 K.

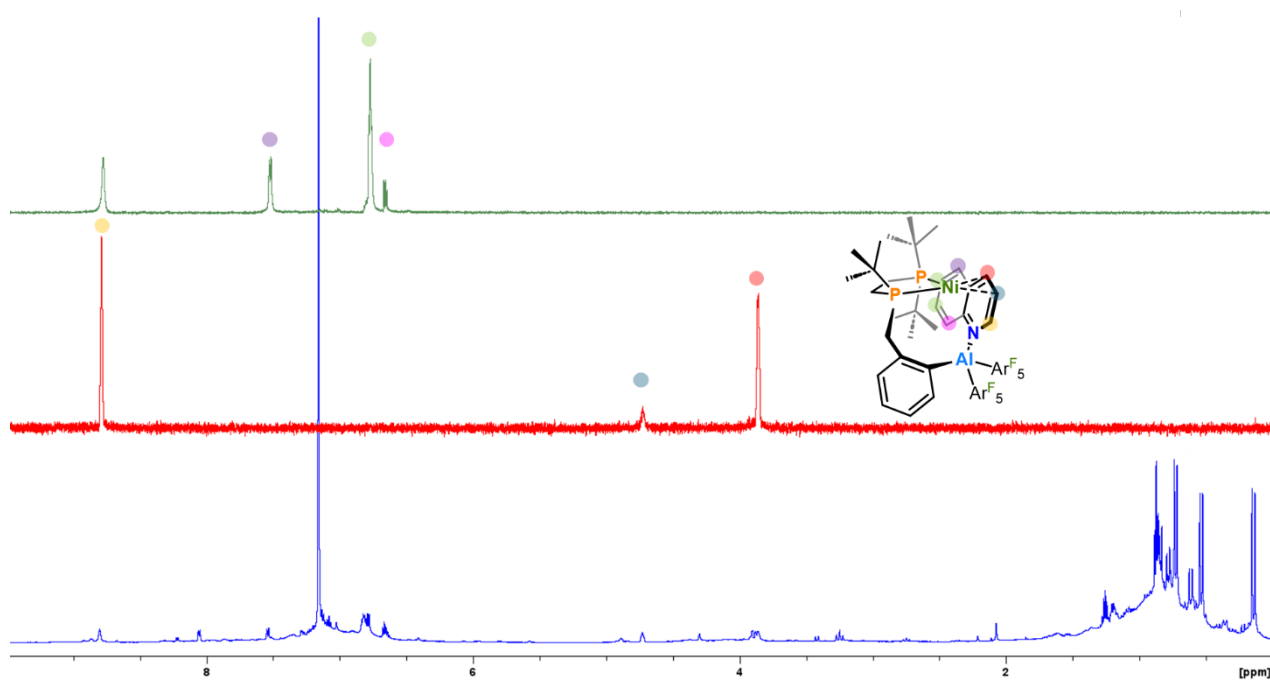

**Figure S42.** 5-Quin, 1D  $^1\text{H}$  TOCSY NMR, Irradiation at  $\delta_{\text{H}} = 8.04$  ppm,  $\text{C}_6\text{D}_6$ , 600 MHz, 298 K.

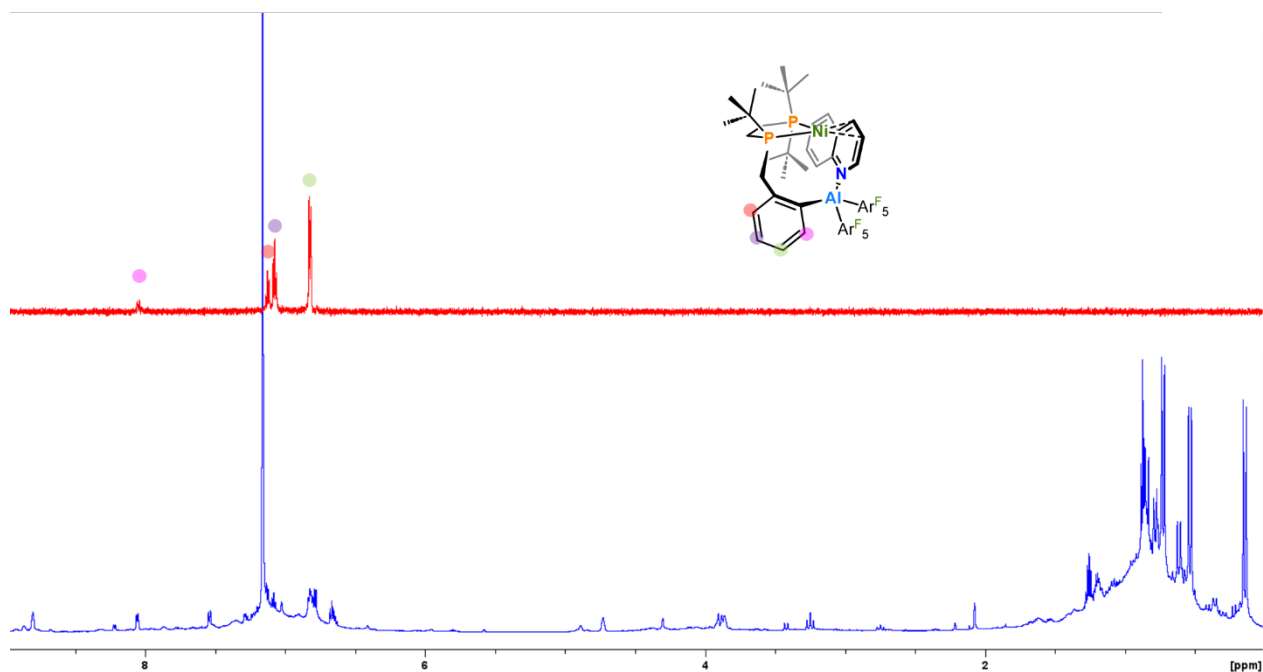

Figure S43. 5-quin,  $^{31}\text{P}$  NMR,  $\text{C}_6\text{D}_6$ , 162 MHz, 298 K (\* = Minor Isomer).

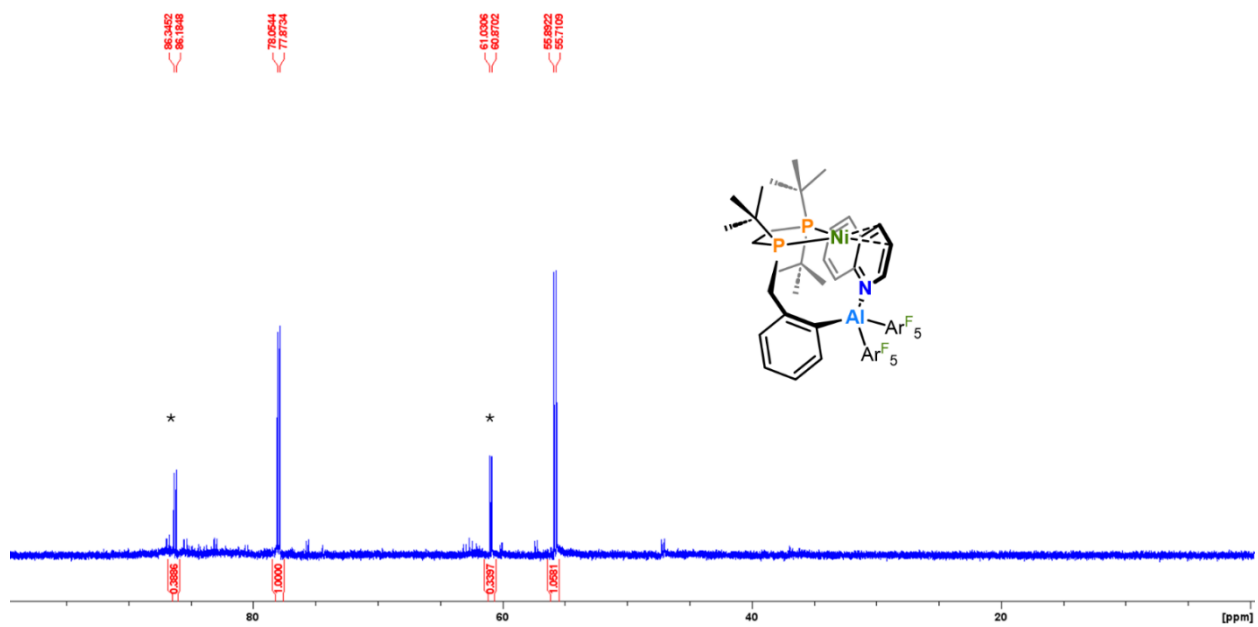

Figure S44. 5-quin, Major Isomer,  $^1\text{H}$ - $^{31}\text{P}$  HMBC NMR,  $\text{C}_6\text{D}_6$ , 400 MHz, 298 K.

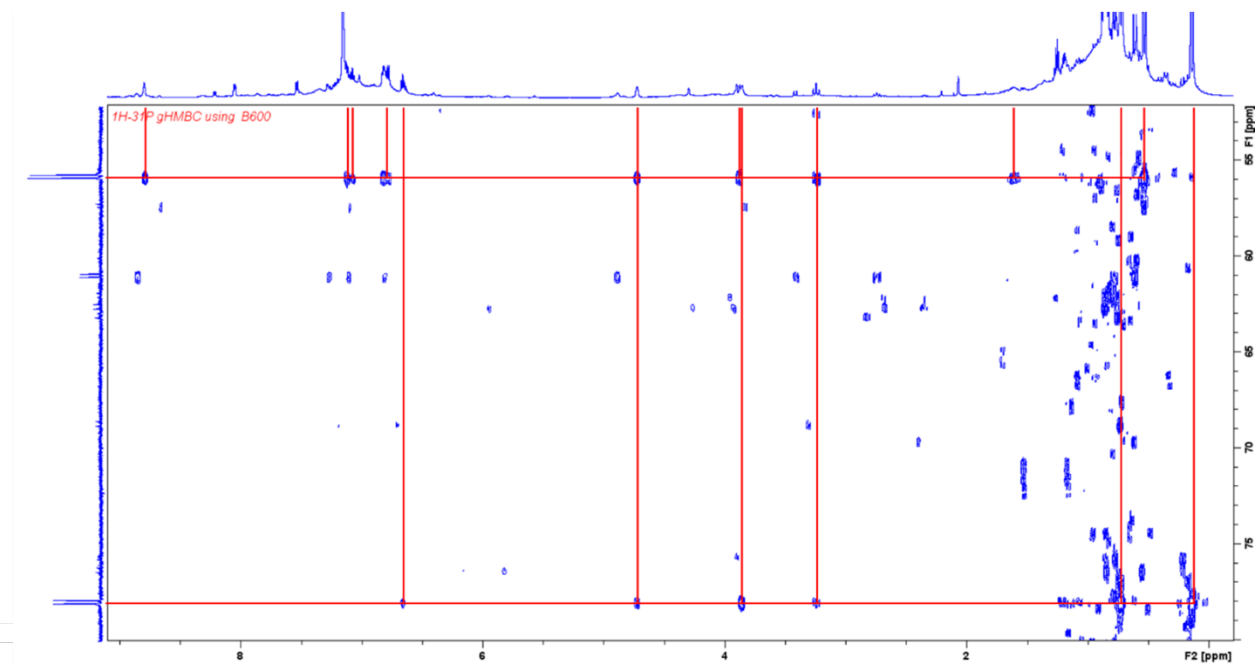

Figure S45. 5-quin, Minor Isomer,  $^1\text{H}$ - $^{31}\text{P}$  HMBC NMR,  $\text{C}_6\text{D}_6$ , 400 MHz, 298 K.

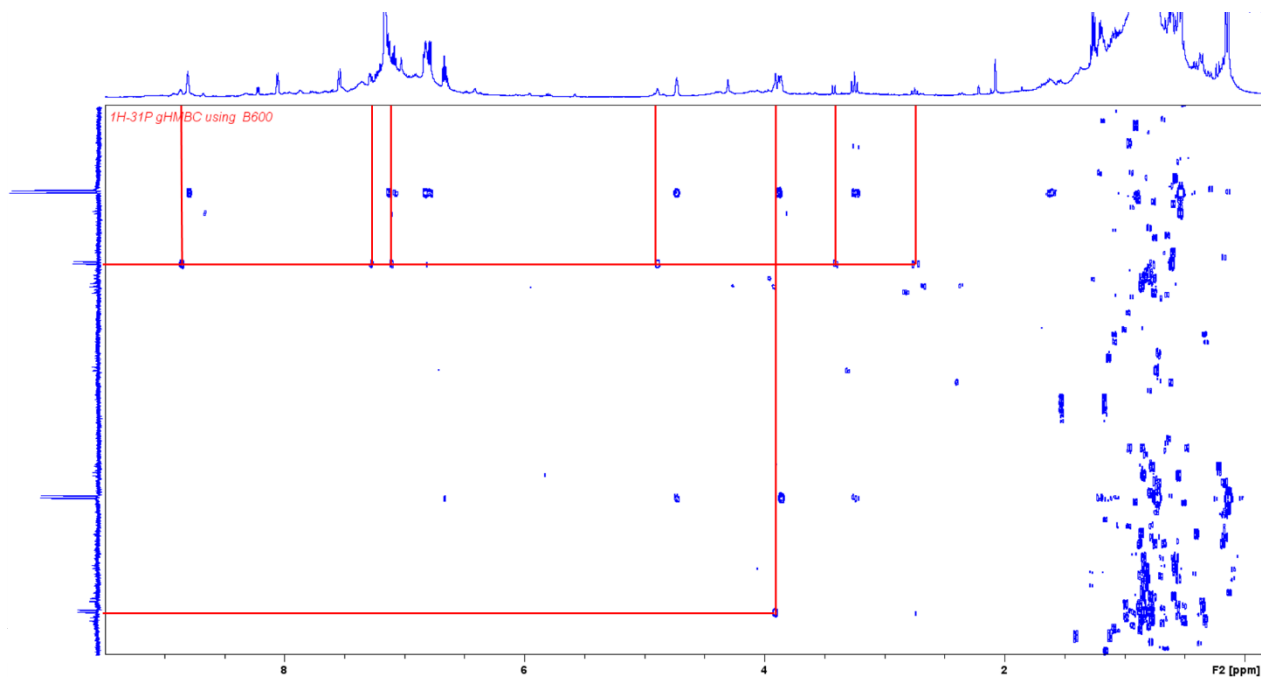

Figure S46. 5-quin,  $^{19}\text{F}$  NMR,  $\text{C}_6\text{D}_6$ , 376 MHz, 298 K (\* = minor isomer, # = unknown impurity).

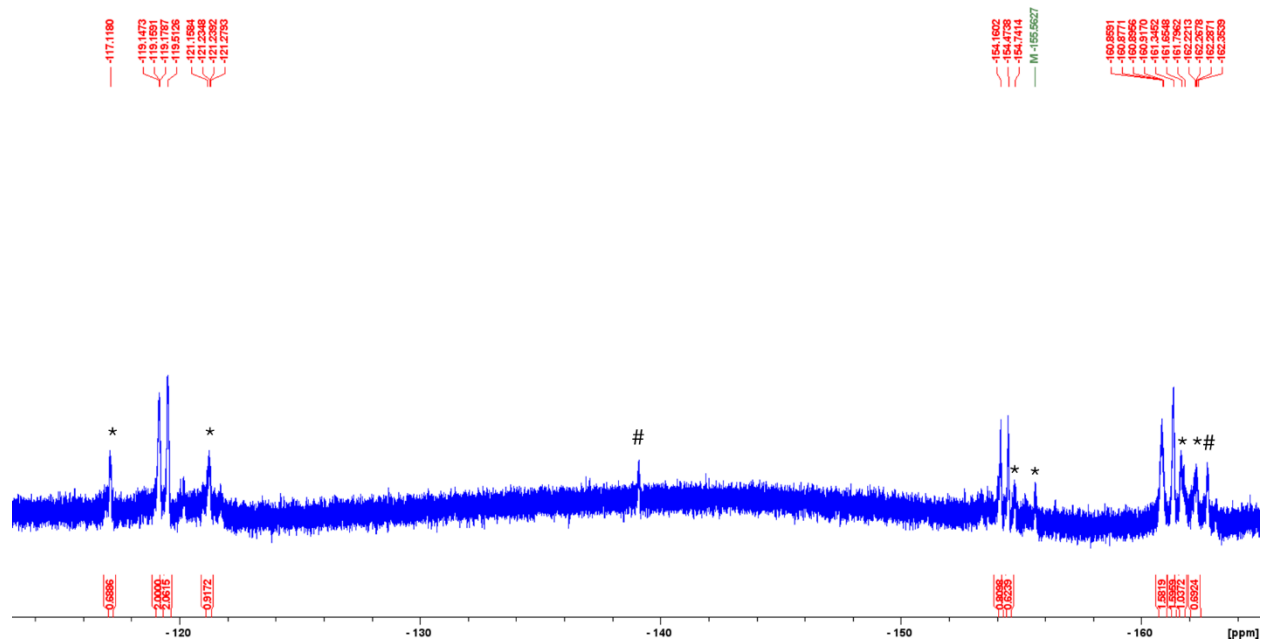

Figure S47. 5-quin,  $^{19}\text{F}$  NMR Stacked Plot,  $\text{C}_6\text{D}_6$ , 376 MHz, 298 K, 4-pyr (red), 5-quin (blue).

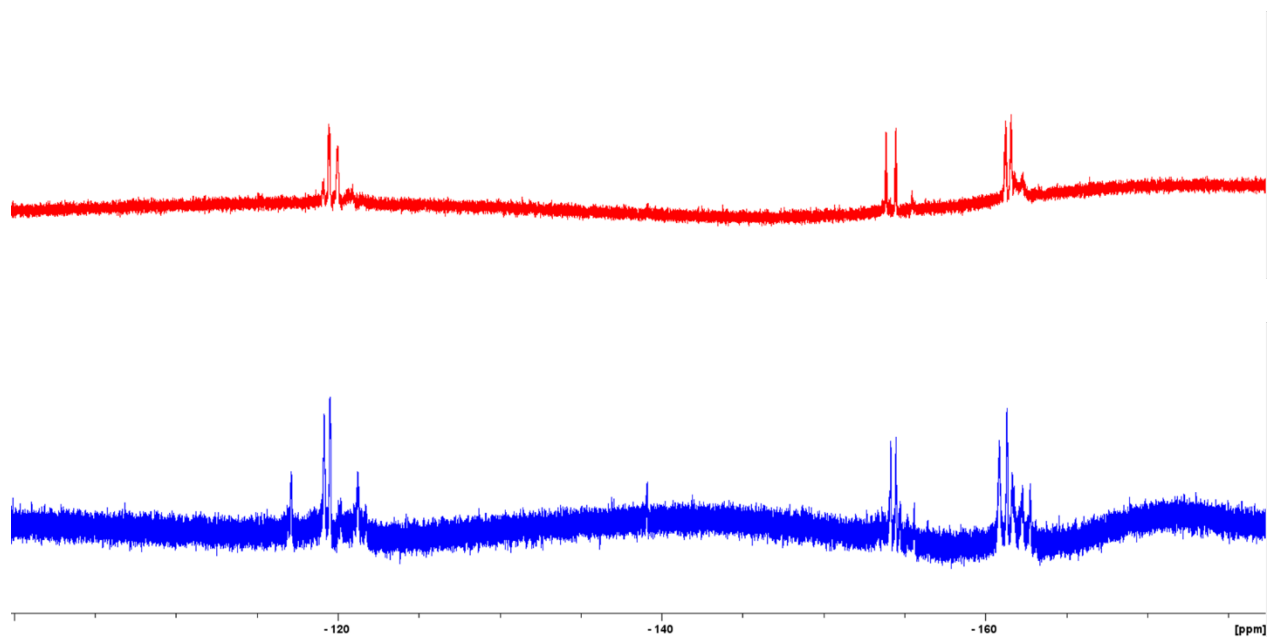

Figure S48. 5-quin,  $^1\text{H}$ - $^{13}\text{C}$  HSQC,  $\text{C}_6\text{D}_6$ , 600 MHz, 298 K showing upfield  $^{13}\text{C}$  chemical shifts of Ni-bound carbons.

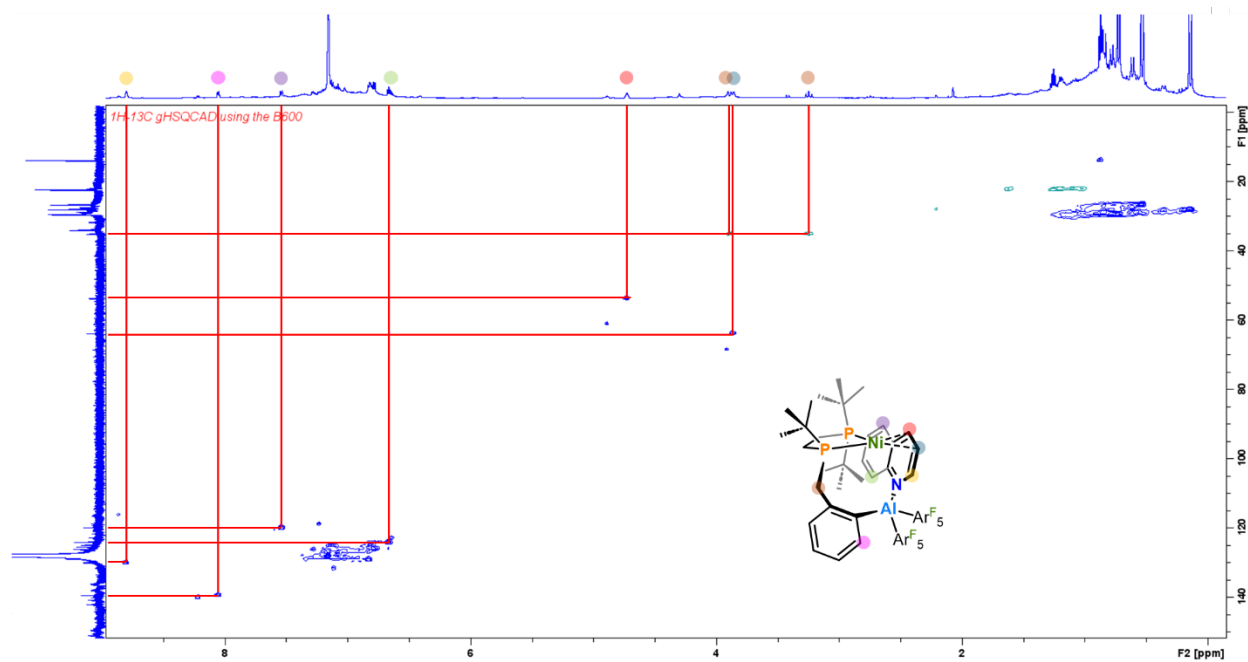

Figure S49. 5-quin,  $^1\text{H}$ - $^{13}\text{C}$  HSQC,  $\text{C}_6\text{D}_6$ , 600 MHz, 298 K showing diphenosphine ethyl backbone.

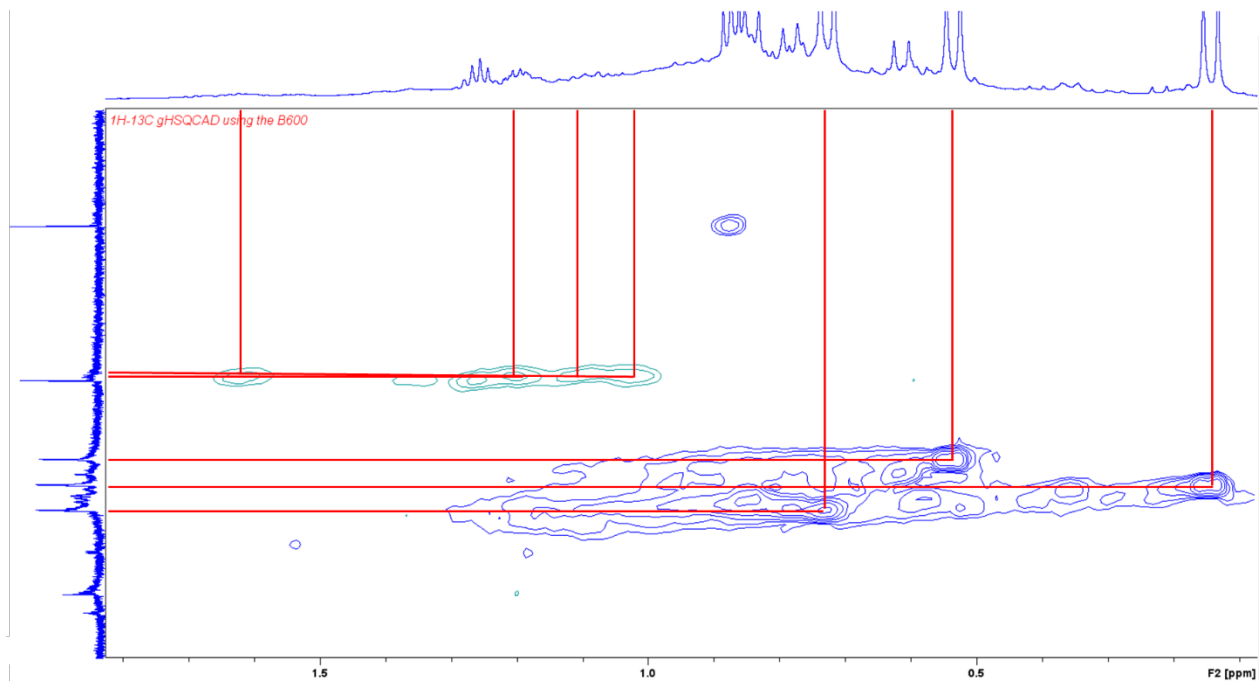

Figure S50. 5-quin,  $^1\text{H}$ - $^{13}\text{C}$  HSQC,  $\text{C}_6\text{D}_6$ , 600 MHz, 298 K showing aromatic region.

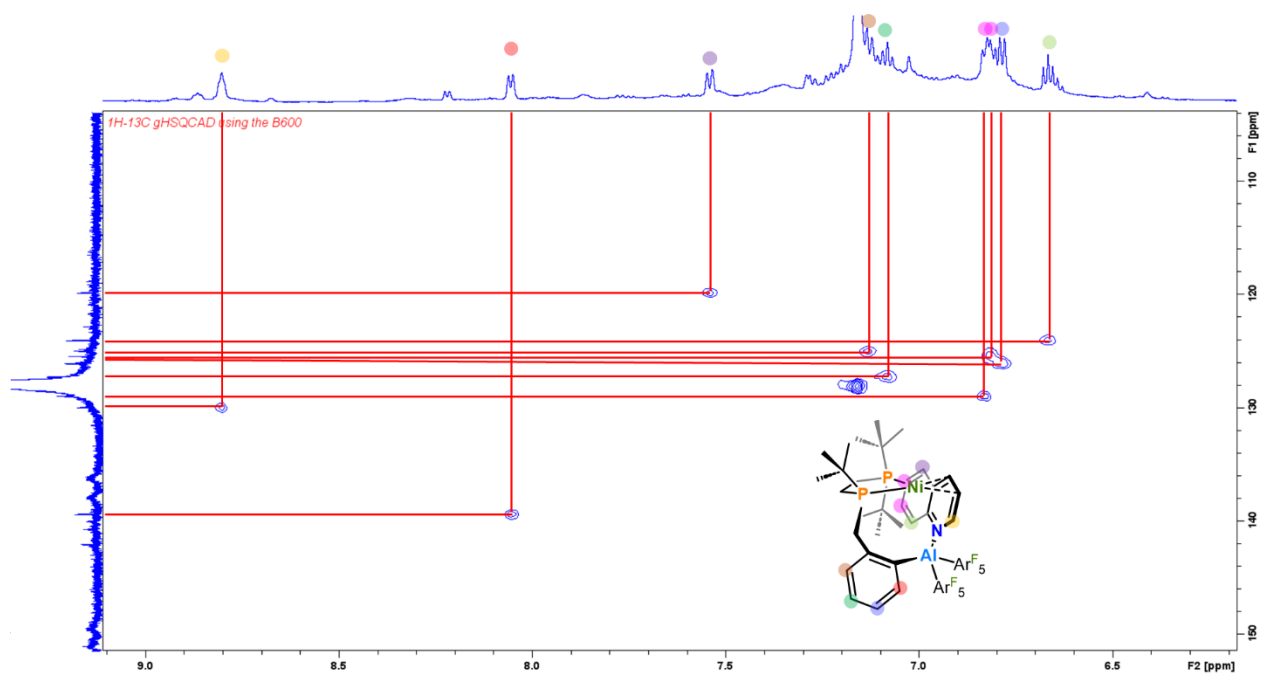

Figure S51: 5-quin,  $^{13}\text{C}\{^1\text{H}\}$  NMR,  $\text{C}_6\text{D}_6$ , 150 MHz, 298 K.

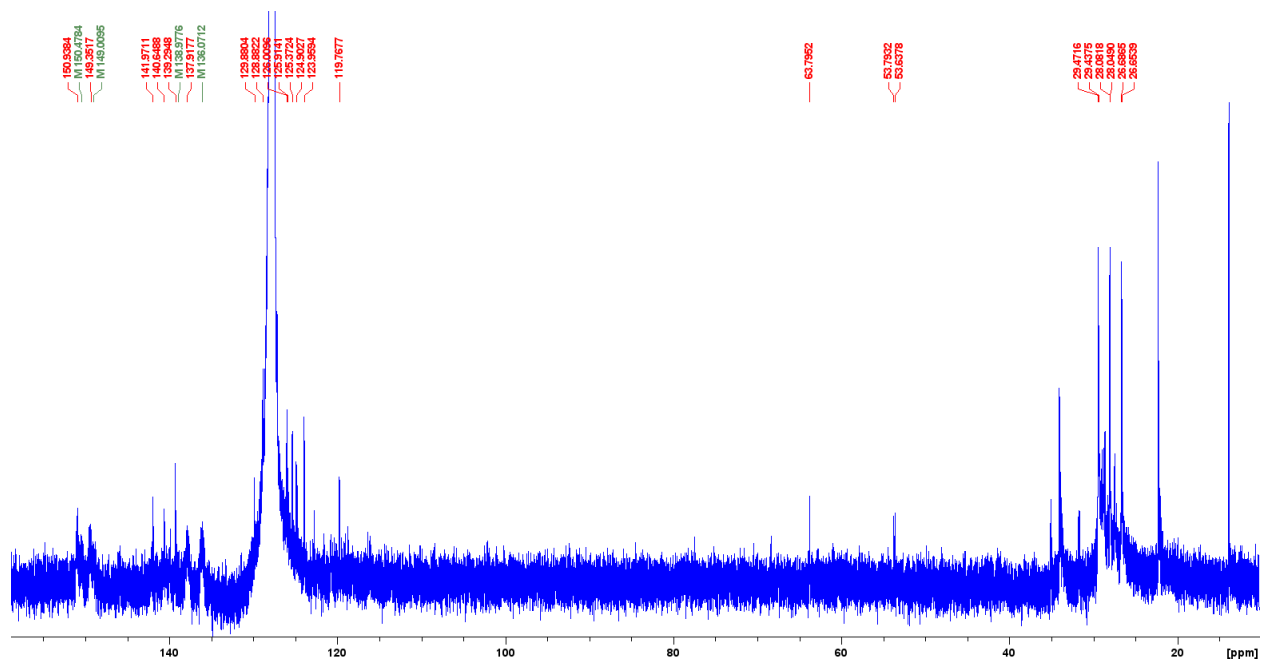

### 3. Mass Spectrometry (APCI-MS):

**Figure S52. 3**, APCI(+)-MS (calcd.  $m/z$  = 713.2050 for  $C_{33}H_{38}AlF_{10}P_2$ , calcd.  $m/z$  = 729.2048 for  $C_{33}H_{38}AlF_{10}OP_2$ ).

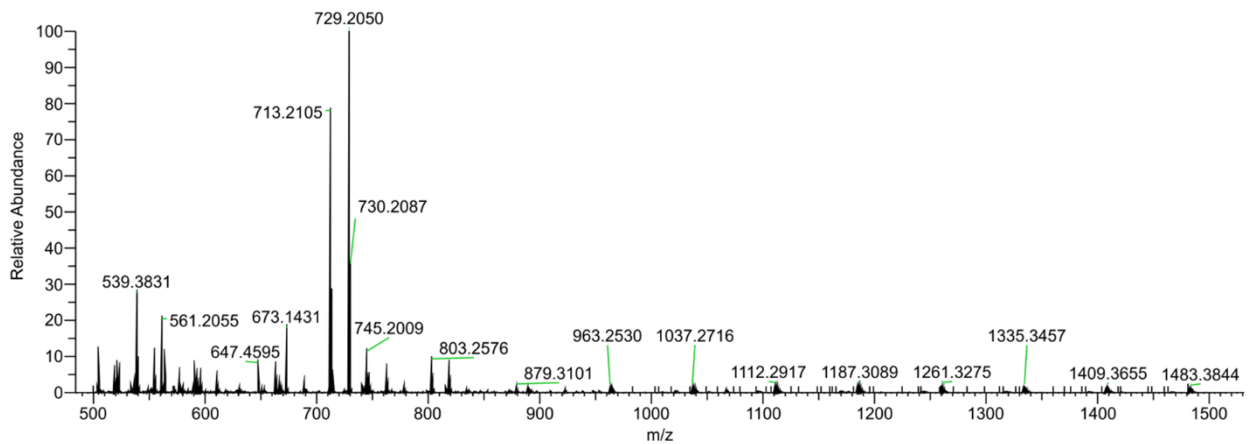

**Figure S53. 4-pyr**, LIFDI(+)-MS (calcd.  $m/z$  = 849.1802 for  $C_{38}H_{42}AlF_{10}NNiP_2$ ).

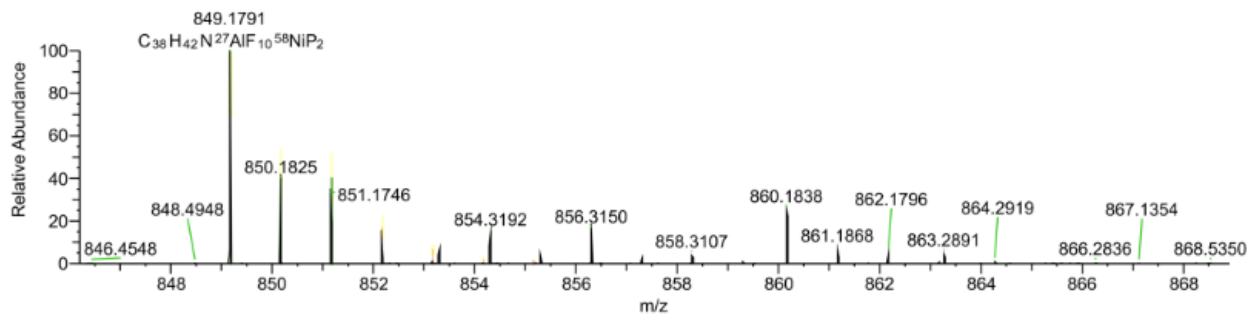

**Figure S54. 5-quin**, LIFDI(+)-MS (calcd.  $m/z$  = 899.1958 for  $C_{42}H_{44}AlF_{10}NNiP_2$ ).

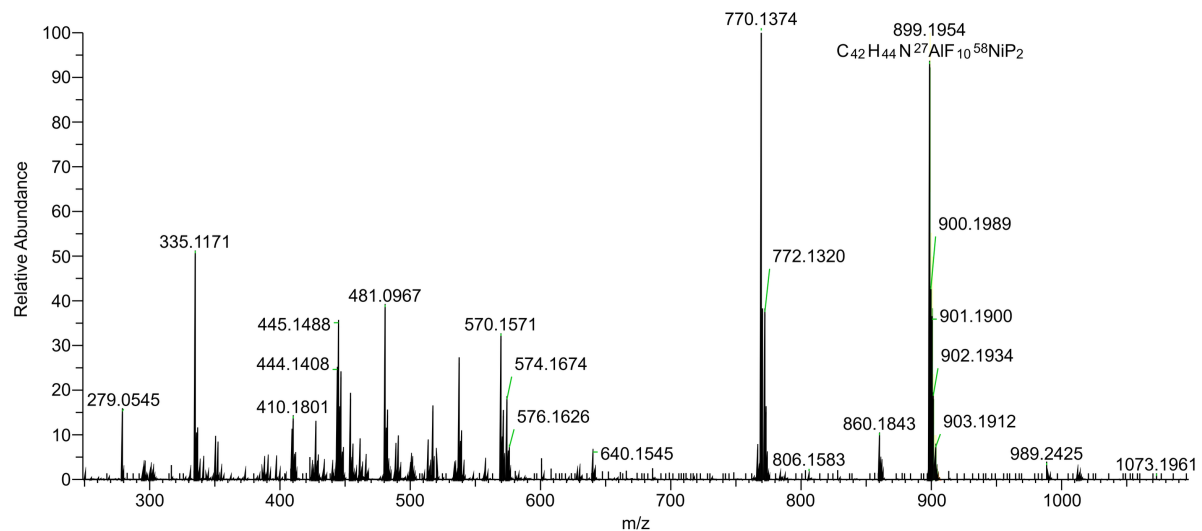

#### **4. Computational Details:**

Calculations were performed using version 6.0.1 of the ORCA computational package.<sup>2</sup> All geometry optimizations and frequency calculations were performed at the r<sup>2</sup>SCAN-3c level of theory.<sup>3</sup> Frequency calculations (*Freq*) were performed to confirm that each optimized geometry was a true minimum indicated by the absence of imaginary frequencies.

Accurate electronic energies were determined using CCSD(T) at the DLPNO-CCSD(T)/def2-TZVP level of theory.<sup>4</sup> The RIJCOSX approximation was used to enhance computational efficiency, along with *def2/J* and *def2-TZVP/C* auxiliary basis sets. *NormalPNO* and *TIGHTSCF* were used by default.

To obtain thermochemical information, the final Gibbs free energies for each chemical species were calculated using the following equation.

$$\Delta G_{solv} = E_{el}(DLPNO-CCSD(T)) + \Delta G_{correction}(DFT) + \Delta G^{\circ}_{solv}(DFT)$$

$E_{el}(DLPNO-CCSD(T))$  is the final electronic energy from a DLPNO-CCSD(T)/def2-TZVP calculation,  $\Delta G_{correction}(DFT)$  is the  $G-E_{el}$  (Gibbs free energy minus the electronic energy) from a BP86-D3(BJ)/def2-TZVP calculation, and  $\Delta G^{\circ}_{solv}(DFT)$  is the sum of  $\Delta G_{ENP}(CPCM\ Dielectric)$  and  $\Delta G_{CDS}(Free-energy(cav+disp))$  from an *SMD=benzene* single point calculation.

## **5. References:**

<sup>1</sup> Zimmerman, A. C.; Fryzuk, M. D. *Organometallics* **2018**, *37*, 2305–2318.

<sup>2</sup> Neese, F. Software Update: The ORCA Program – Version 5.0. *WIREs Comput. Mol. Sci.*, 2022, *12*(1), e1606.

<sup>3</sup> Grimme, S.; Hansen, A.; Ehlert, S.; Mewes, J. *J. Chem. Phys.* **2021**, *154*, 064103.

<sup>4</sup> a) C. Riplinger, P. Pinski, U. Becker, E.F. Valeev, F. Neese, *J. Chem. Phys.* **2016**, *144*, 024109; b) C. Riplinger, B. Sandhoefer, A. Hansen, F. Neese, *J. Chem. Phys.* **2013**, *139*, 134101; c) C. Riplinger, F. Neese, *J. Chem. Phys.* **2013**, *138*, 034106.
